1 Actomyosin forces and the energetics of red blood cell invasion by the  
2 malaria parasite *Plasmodium falciparum*

3

4 Thomas C. A. Blake<sup>1</sup>, Silvia Haase<sup>1</sup> and Jake Baum<sup>1,\*</sup>

5

6 <sup>1</sup>Department of Life Sciences, Imperial College London, South Kensington, London SW7 2AZ, UK.

7

8 \*Correspondence to:

9 Jake Baum ([jake.baum@imperial.ac.uk](mailto:jake.baum@imperial.ac.uk)), Department of Life Sciences, Imperial College London,

10 Exhibition Road, South Kensington, London, SW7 2AZ, UK. Tel. +44 (0)20 75945420

11

12 **Short title:** Myosin motors in malaria red cell entry

13

14 **Keywords:**

15 Actomyosin; erythrocyte; red blood cell (RBC); Myosin A (MyoA); Myosin B (MyoB); Essential Light

16 Chain (ELC); live video-microscopy

## 1 Summary

2 All symptoms of malaria disease are associated with the asexual blood stages of development,  
3 involving cycles of red blood cell (RBC) invasion and egress by the *Plasmodium* spp. merozoite.  
4 Merozoite invasion is rapid and is actively powered by a parasite actomyosin motor. The current  
5 accepted model for actomyosin force generation envisages arrays of parasite myosins, pushing  
6 against short actin filaments connected to the external milieu that drive the merozoite forwards into  
7 the RBC. In *Plasmodium falciparum*, the most virulent human malaria species, Myosin A (PfMyoA) is  
8 critical for parasite replication. However, the precise function of PfMyoA in invasion, its regulation,  
9 the role of other myosins and overall energetics of invasion remain unclear. Here, we developed a  
10 conditional mutagenesis strategy combined with live video microscopy to probe PfMyoA function  
11 and that of the auxiliary motor PfMyoB in invasion. By imaging conditional mutants with increasing  
12 defects in force production, based on disruption to a key PfMyoA phospho-regulation site, the  
13 absence of the PfMyoA essential light chain, or complete motor absence, we define three distinct  
14 stages of incomplete RBC invasion. These three defects reveal three energetic barriers to successful  
15 entry: RBC deformation (pre-entry), mid-invasion initiation, and completion of internalisation, each  
16 requiring an active parasite motor. In defining distinct energetic barriers to invasion, these data  
17 illuminate the mechanical challenges faced in this remarkable process of protozoan parasitism,  
18 highlighting distinct myosin functions and identifying potential targets for preventing malaria  
19 pathogenesis.

## 1 Introduction

2 Malaria disease is caused by single-celled, obligate intracellular parasites from the genus  
3 *Plasmodium*, the most virulent species being *Plasmodium falciparum*. All symptoms of malaria  
4 disease result from cycles of parasite invasion into, development within and egress from red blood  
5 cells (RBCs) so improved understanding of the process of parasite invasion remains a central target  
6 for future therapeutics (Burns *et al*, 2019). RBC invasion is mediated by merozoites, specialised  
7 motile cells around 1  $\mu\text{m}$  in size (Dasgupta *et al*, 2014) that employ substrate-dependent gliding  
8 motility (Yahata *et al*, 2020). Merozoites are primed for invasion by phosphorylation of the motility  
9 apparatus before RBC egress (Alam *et al*, 2015) and have a short window of viability to invade, in the  
10 seconds to minutes range (Boyle *et al*, 2010). Having encountered an RBC, merozoites initially attach  
11 to the RBC membrane via weak, non-specific interactions followed by strong contact via parasite  
12 adhesins (Tham *et al*, 2015). Once attached, the process of invasion is rapid. Video microscopy of  
13 invasion reveals that it takes 20-30 s (Dvorak *et al*, 1975; Gilson & Crabb, 2009) and consists of  
14 several distinct phases. The merozoite actively deforms the RBC, reorientates to its apex, and then  
15 attaches irreversibly to the RBC via formation of a tight junction (TJ) (Riglar *et al*, 2011), a parasite  
16 secreted complex thought to act as a point of traction (Baum & Cowman, 2011). Active penetration  
17 of the RBC then follows (Miller *et al*, 1979). Parasite adhesins are secreted from apical organelles,  
18 the micronemes and rhoptries, in response to a signalling cascade involving  $\text{Ca}^{2+}$  ions (Singh *et al*,  
19 2010; Bullen *et al*, 2016) which also regulates phosphorylation of adhesins and actomyosin  
20 components (Paul *et al*, 2015; Fang *et al*, 2018). Finally, after completion of invasion the RBC usually  
21 undergoes a process of echinocytosis, shrinking and producing spicules in response to the  
22 perturbation to osmotic balance that follows rhoptry secretion and membrane disruption.

23 *Plasmodium* merozoites rely on a conserved molecular motor for gliding and invasion, centred  
24 around a MyoA motor complex (MMC) (Baum *et al*, 2006) or glideosome, situated in the narrow  
25 space between the parasite plasma membrane and the double membrane inner membrane complex  
26 (IMC) (Fréchal *et al*, 2017). *P. falciparum* MyoA (PfMyoA) is a small, atypical myosin motor that  
27 belongs to the alveolate-specific class XIV. Like other class XIV myosins, PfMyoA comprises a motor  
28 domain and a light chain-binding neck domain but lacks an extended myosin tail domain for cargo-  
29 binding. Instead, PfMyoA relies on a regulatory light chain or myosin tail interacting protein, MTIP,  
30 that binds the extreme end of the neck domain and unusually possesses a long, disordered N-  
31 terminal domain to anchor PfMyoA to the IMC (Bergman *et al*, 2003). Maximal *in vitro* activity of  
32 PfMyoA requires the binding of MTIP and a second essential light chain, PfELC (Bookwalter *et al*,  
33 2017), recently shown to stabilise the PfMyoA neck domain and is critical for parasite replication  
34 (Moussaoui *et al*, *manuscript submitted*). The complex of PfMyoA and its light chains (the PfMyoA

1 triple complex) is anchored to the IMC by a glideosome associated protein, PfGAP45 (Fréna1 *et al*,  
2 2010; Perrin *et al*, 2018) and other GAP proteins embedded in the IMC membranes that together  
3 complete the MMC. Genetic demonstration that *Plasmodium berghei* MyoA is critical for motility of  
4 the mosquito-infecting ookinete stage (Sidén-Kiamos *et al*, 2011) and PfMyoA is critical for blood-  
5 stage replication (Robert-Paganin *et al*, 2019) confirm that PfMyoA is at the core of the parasite  
6 force generation and hence invasion/motility machinery.

7 PfMyoA produces directional force by undergoing cycles of ATP hydrolysis and conformational  
8 change, allowing it to translocate short, unstable actin filaments (Das *et al*, 2017; Lu *et al*, 2019) that  
9 are in turn connected to the external substrate. The crystal structures of the PfMyoA motor domain  
10 (Robert-Paganin *et al*, 2019) and triple complex (Moussaoui *et al*, manuscript submitted) reveal a  
11 unique mechanism of force production involving stabilisation of the rigor-like state by an interaction  
12 between K764 in the converter and phospho-S19 in the N-terminal extension (NTE). Disruption of  
13 this interaction *in vitro* reduced the velocity of PfMyoA but increased its maximal force production  
14 (Robert-Paganin *et al*, 2019), suggesting that phosphorylation of S19 is required for maximal myosin  
15 velocity. A “phospho-tuning” model was therefore proposed to explain how the same motor is  
16 optimised for speed in fast gliding stages or force production during invasion.

17 Several questions remain about PfMyoA organisation and function, in particular how motor force is  
18 integrated with retrograde flow of parasite plasma membrane (Quadt *et al*, 2016; Moreau *et al*,  
19 2017; Whitelaw *et al*, 2017; Gras *et al*, 2019) and is applied across the parasite (Tardieux & Baum,  
20 2016). Evidence from imaging suggests MyoA may regulate force production at discrete adhesion  
21 sites, rather than acting as a simple linear motor (Münter *et al*, 2009; Whitelaw *et al*, 2017).

22 However, these questions have been addressed in non-merozoite stages of *Plasmodium* or related  
23 parasite *Toxoplasma gondii*, where TgMyoA is critical but not absolutely required for invasion  
24 (Meissner *et al*, 2002; Andenmatten *et al*, 2013; Bichet *et al*, 2016), so a greater understanding of  
25 the mechanical function of actomyosin during merozoite invasion is important. At least two  
26 energetic barriers during invasion require actomyosin activity, since chemical (Miller *et al*, 1979;  
27 Weiss *et al*, 2015) or genetic (Das *et al*, 2017; Perrin *et al*, 2018) disruption of actomyosin blocks the  
28 profound deformations of the RBC and merozoite internalisation. RBCs still undergo echinocytosis  
29 under these conditions suggesting that some breach of the RBC has still occurred. Biophysical  
30 modelling of RBC invasion suggests that actomyosin force may also be required for a third energetic  
31 barrier, to drive completion of entry and closure of the invasion pore (Dasgupta *et al*, 2014),  
32 however, no there is no evidence for this.

33 The importance of the biophysical properties of the RBC in determining the extent of any energetic  
34 barrier to parasite invasion has received increasing interest recently. Higher RBC membrane tension,

1 for example, has been shown to reduce invasion success, whether due to natural variation or genetic  
2 polymorphisms such as the Dantu blood group (Kariuki *et al.*, 2018). The *Plasmodium* merozoite  
3 appears to exploit the nature of these biophysical properties at multiple levels. For example, the  
4 binding of the parasite adhesin EBA-175 to its RBC receptor reduces the RBC membrane bending  
5 modulus (Koch *et al.*, 2017; Sisquella *et al.*, 2017). Overall, this paints a clear picture of invasion as an  
6 efficient balance of parasite force and modulation of the host cell biophysical properties (Dasgupta  
7 *et al.*, 2014; Koch & Baum, 2016). However, a complete understanding of the energetic barriers  
8 found throughout the invasion process still remains unresolved.

9 Here, to gain insight into the energetics invasion and the role actomyosin activity plays during  
10 merozoite invasion, a conditional knockout approach was employed, building on the PfMyoA  
11 knockout (Robert-Paganin *et al.*, 2019) to generate conditional mutations of PfMyoA and to target  
12 the auxiliary motor PfMyoB. PfMyosin B (MyoB) is a second *Plasmodium* class XIV localised to the  
13 extreme merozoite apex, suggesting a function during invasion, such as driving the initial stages of  
14 internalisation or organising apical organelles (Yusuf *et al.*, 2015). Alongside a conditional knockout of  
15 light chain PfELC (Moussaoui *et al.*, *manuscript submitted*), each mutant was analysed during  
16 merozoite invasion by video microscopy revealing three distinct stages of incomplete or aborted RBC  
17 invasion depending on actomyosin defect severity. The spectrum of phenotypes seen support the  
18 existence of three clear energetic barriers to successful entry, which together with previous works  
19 supports a stepwise model for actomyosin force action during merozoite invasion.

## 1 Results

### 2 Development of an ectopic expression platform for *Plasmodium* myosins

3 We demonstrated previously that PfMyoA is critical for asexual replication (Robert-Paganin *et al*,  
4 2019). This was achieved using a conditional knockout system based on rapamycin (RAP)-dependent  
5 DiCre recombinase excision of the 3' end of the *Pfmyoa* gene. Excision relies on *loxP* sites contained  
6 within synthetic introns (*loxPint*) (Jones *et al*, 2016) that were integrated into the *Pfmyoa* gene by  
7 selection-linked integration (SLI) (Birnbaum *et al*, 2017). As well as confirming that PfMyoA is  
8 critically important, we reasoned that this PfMyoA-CKO parasite line could be used as a platform for  
9 further investigation into the function of PfMyoA.

10 A strategy was developed to express mutant alleles of *Pfmyoa* from a second locus in the PfMyoA-  
11 CKO parasite line, to enable conditional mutation of any part of PfMyoA. We used the *p230p* locus,  
12 identified as dispensable throughout the parasite life cycle (van Dijk *et al*, 2010) and developed for  
13 targeted CRISPR/Cas9 integration (Ashdown *et al*, 2020, *in press*). To facilitate gene replacement on  
14 top of the PfMyoA-CKO background, the *p230p* targeting plasmid (pDC2-p230p-hDHFR) was modified  
15 by the exchange of *hdhfr* for *bsd*, which encodes the *blasticidin-S-deaminase* resistance gene (since  
16 PfMyoA-CKO parasites already express hDHFR) to form the pDC2-p230p-BSD targeting plasmid  
17 (Figure 1A). In the repair template plasmid (p230p-BIP-sfGFP, in which super-folder GFP (sfGFP) is  
18 inserted into the *p230p* locus) the constitutive BIP promoter was exchanged for the endogenous  
19 *Pfmyoa* promoter (prMA) for appropriate transgene expression timing (Figure 1A). The *Pfmyoa*  
20 promoter was amplified from 3D7 genomic DNA (defined as 2 kbp of sequence upstream of *Pfmyoa*)  
21 and introduced to form the p230p-prMA-sfGFP repair plasmid. The two plasmids were co-  
22 transfected into B11 (the parent line of PfMyoA-CKO) to generate p230p-prMA-sfGFP parasites,  
23 which exhibited merozoite-specific expression of sfGFP (Figure S1).

24 Having validated sfGFP expression in late stages, the p230p-prMA-sfGFP construct was further  
25 modified by exchange of *sfGFP* for *Pfmyoa* (re-codon optimised to avoid recombination) to form  
26 p230p-prMA-PfMyoA, which was transfected into the PfMyoA-CKO parasite line. In addition to wild  
27 type *Pfmyoa*, generating straight PfMyoA-complementation, an additional construct was made  
28 carrying a K764E mutation, forming PfMyoA-K764E parasites. The K764E mutation was designed to  
29 probe phospho-regulation of PfMyoA, wherein the charge reversal should repel phospho-S19 and  
30 prevent the stabilising effect of the K764-phospho-S19 interaction, proposed to enable fast cycling of  
31 PfMyoA in fast gliding stages (Robert-Paganin *et al*, 2019). This mutation should leave merozoites  
32 unaffected if they only need PfMyoA for maximal force production during invasion (Figure 1B).  
33 PfMyoA-comp and PfMyoA-K764E parasites were successfully generated, and the modification was  
34 confirmed by genotyping PCR, with no detectable WT remaining in PfMyoA-comp parasites (Figure

1 1C). Two independent attempts to generate corresponding mutations in S19 (testing the inverse site  
2 to K764), or to delete the entire N-terminal extension (residues 2-19) were unsuccessful.

3 Comparison of parasite growth over 96 h, without RAP induction, revealed no growth defect in  
4 PfMyoA-comp compared to the parental line (Figure 1D). The PfMyoA-K764E line demonstrated a  
5 94% relative fitness per cycle (Figure 1D). This was unexpected, since the endogenous *Pfmyoa* locus  
6 is still present, suggesting that the second allele exhibits a slight dominant negative effect. This could  
7 explain the failure of transfection for more disruptive mutations in the N-terminal extension.

#### 8 Conditional complementation and mutagenesis of PfMyoA

9 To conditionally ablate the endogenous *Pfmyoa* allele, synchronised ring stage parasites were  
10 treated with rapamycin (RAP, 16 h, 100 nM), or DMSO as a control, in cycle 0 and parasitaemia was  
11 quantified by flow cytometry in each of the following three cycles. Excision of the *Pfmyoa* locus was  
12 verified by genotyping PCR and Western blot (Figure 2B-C). RAP-treated PfMyoA-comp parasites  
13 grew indistinguishably from DMSO-treated parasites, confirming that the severe growth defect seen  
14 in PfMyoA-CKO parasites is due to the truncation of PfMyoA. In contrast, RAP-treated PfMyoA-K764E  
15 parasites had a moderate growth defect, growing at, on average, 55% of DMSO-treated controls per  
16 cycle (Figure 2A).

17 The PfMyoA light chain PfELC is essential for asexual replication (Moussaoui *et al*, manuscript  
18 submitted), but *in vitro* data shows that the complex of PfMyoA and MTIP can translocate actin  
19 without PfELC, albeit at half the speed (Bookwalter *et al*, 2017). This suggests that the absence of  
20 PfELC leaves a functional but strongly weakened motor. In light of the recent, unexpected  
21 demonstration that *P. falciparum* merozoites glide on a substrate when in static culture (Yahata *et*  
22 *al*, 2020), the static RAP growth assays were repeated, including PfELC-CKO, split equally between  
23 static and suspension conditions (Figure 2D). The strong replication defects in PfMyoA-CKO and  
24 PfELC-CKO lines were enhanced under suspension culture. In contrast, the replication defect of  
25 PfMyoA-K764E parasites was partially alleviated under suspension culture (from 67% of DMSO to  
26 77%,  $p=0.03$ ), consistent with the K764-phospho-S19 interaction being dispensable for invasion  
27 when gliding is bypassed by suspension culture (Figure 2D).

#### 28 Disruption of PfMyoB produces a mild growth defect

29 A contributor to the residual invasion seen in *T. gondii* MyoA-CKO parasites is myosin redundancy  
30 (Fréchal *et al*, 2014). *Plasmodium* spp. lack the paralogues of TgMyoA, but do possess two genus-  
31 specific myosins, PfMyoB and PfMyoE, that could support PfMyoA during invasion. Genetic deletion  
32 of *P. berghei* MyoB caused no obvious defect throughout the life cycle (Wall *et al*, 2019), so to  
33 confirm whether PfMyoB is also dispensable and to investigate its role during invasion, a conditional



1 KO was designed based on the PfMyoA-cKO line. Due to the difficulties in obtaining a pure  
2 transgenic population with the PfMyoA-cKO construct using SLI, a CRISPR-mediated strategy was  
3 developed for insertion of *loxPint* modules and a 3xHA-tag to the *Pfmyob* locus (Figure 3A). The  
4 construct was designed to conditionally excise 204 amino acids at the PfMyoB C-terminus, including  
5 the lever arm (containing the MLC-B light chain binding site) and part of the core motor domain,  
6 which on excision would form a truncated protein fused to sfGFP (Figure 3B). PfMyoB-cKO parasites  
7 were generated from the DiCre-expressing B11 line and verified by genotyping PCR (Figure 3C),  
8 showing no residual wild-type parasites. Culturing PfMyoB-cKO parasites alongside the parental line  
9 over 96 h in the absence of RAP showed no difference in growth (Figure 3D).

10 RAP treatment of PfMyoB-cKO parasites produced a small, consistent growth defect, with a fitness  
11 of 93% per cycle relative to DMSO treatment, compared to WT parasites which had a relative fitness  
12 of 98% per cycle (Figure 3G). Schizont samples taken at the end of cycle 0 and analysed by  
13 genotyping PCR or Western blot confirmed that excision was almost complete (Figure 3E,F).  
14 Therefore, disruption of PfMyoB produces a small growth defect, and if PfMyoB is involved in  
15 merozoite invasion, its function is not essential in the presence of functional PfMyoA.

#### 16 Video microscopy of merozoite invasion

17 Quantification of the growth defects observed in PfMyoA-cKO, PfMyoA-K764E, PfELC-cKO or  
18 PfMyoB-cKO gives only limited information about their cellular function. Video microscopy has long  
19 been used to describe merozoite invasion (Dvorak *et al.*, 1975; Gilson & Crabb, 2009; Weiss *et al.*,  
20 2015) and more recently to uncover the effects of RBC and parasite mutants (Yap *et al.*, 2014; Volz *et al.*,  
21 2016; Kariuki *et al.*, 2018). However, the technique is not often used to capture large data sets on  
22 multiple parasite lines, due to the time required to capture and analyse the videos.

23 Having generated a panel of mutants addressing parasite myosin functions, we set out to analyse  
24 merozoite invasion by video microscopy after DMSO and RAP treatment. As in previous assays,  
25 parasites were treated, then incubated for ~40 h until near the end of the same cycle. Purified  
26 schizonts were arrested before egress using PKG inhibitor ML10 (Baker *et al.*, 2017) to increase  
27 synchronicity and schizont maturity. In turn, samples of each line were washed thoroughly to  
28 remove the drug and videos were captured in duplicate, for each of two independent biological  
29 repeats. Brightfield videos were recorded (3 fps, 10 minutes) and green fluorescence was captured  
30 at the start and end, permitting the exclusion of parasites that had not undergone proper excision  
31 after RAP treatment, except for PfELC-cKO which did not include a GFP-tag. Attempted invasion was  
32 defined as any merozoite attachment to an RBC that triggers echinocytosis. Almost 1300 invasion  
33 events were captured (between 88-204 for each line and treatment), of which around 55% were  
34 clear throughout the event, resulting in a dataset of 692 events.



1 Merozoite invasion can be broken down into attachment to the RBC, followed by deformation,  
2 internalisation and echinocytosis (Figure 4A). Depending on how many phases were achieved in an  
3 event, we classified invasion using a scheme adapted from (Yap *et al.*, 2014) as either: (Type A)  
4 successful invasion; (Type B) internalisation incomplete and ejection of the merozoite; (Type C)  
5 deformation present but no internalisation; or (Type D) neither deformation or internalisation  
6 present, just attachment (Figure 4E). Comparison of the distribution of event types across the  
7 DMSO-treated lines shows that successful invasion was the most common event. Unexpectedly,  
8 DMSO-treated PfMyoB-cKO parasites had a much higher rate of invasion success (91% vs next  
9 highest 71%,  $p=0.038$  PfMyoB-cKO vs others) (Figure 4C) suggesting that the other lines had slightly  
10 impaired invasion even after DMSO treatment, perhaps due to the sensitivity of PfMyoA or PfELC to  
11 epitope tags or the SLI machinery.

12 A qualitative score was assigned to each event based on the intensity of the deformation, from 0 (no  
13 deformation, just attachment) to 3 (severe deformation of the RBC extending across the cell),  
14 developed by (Weiss *et al.*, 2015) (Figure 4B). Comparison of the deformation scores between  
15 successful invasion events and invasion failures shows that invasion failures had significantly  
16 stronger deformations ( $p<0.0001$ ) with a higher mean deformation score of 1.71, compared to 1.54  
17 (Figure 4D).

18 For successful invasion and Type B failures, the scheme of (Gilson & Crabb, 2009) was adapted for  
19 timing the duration of five phases: deformation, internalisation and echinocytosis and the two  
20 pauses: before internalisation, when the TJ is thought to be formed, and after internalisation, before  
21 echinocytosis. Comparison of the phase timings from DMSO-treated parasites with published values  
22 shows similar results (Gilson & Crabb, 2009) (Figure 4F). Since the events for each line were pooled  
23 across two biological repeats, an example comparison was made between the two biological repeats  
24 for PfMyoA-comp after DMSO treatment (Figure S2), confirming that they were highly similar.

25 Type B failures as defined previously (Yap *et al.*, 2014) (there called Type III invasion) as merozoites  
26 that did not produce a ring despite triggering echinocytosis, due to failure of resealing. This was  
27 sometimes followed by ejection of the merozoite to the outside of the RBC. In our video  
28 observations, Type B failures occurred in 4% of DMSO-treated parasite events (13/333) and were  
29 defined as any event where ejection of merozoites to the outside of the RBC was observed. In Type B  
30 failures the invasion attempt consistently begins normally and only after echinocytosis is complete is  
31 the merozoite ejected from the RBC through the same invasion pore. Compared to Type A invasion,  
32 Type B invasion attempts had slower internalisation and a trend towards a longer pause before  
33 internalisation (Figure S3).

1 Ejection presumably occurs due to a defect in resealing the pore, as it was only observed long after  
2 the apparent end of internalisation, though the driving force behind the ejection remains unclear. In  
3 some videos the invasion pore remained visible until ejection of the merozoite, while in others the  
4 merozoite appeared motile throughout, performing a swirling motion during and after ejection  
5 (Figure S3, Video S6). After ejection, merozoites typically remained attached to the RBC and none  
6 underwent a second invasion attempt before the end of the video. Type B failures may result from a  
7 combination of lower parasite force production and increased RBC biophysical resistance, as  
8 described by biophysical models of invasion, which includes the role of the TJ in providing line  
9 tension to close the pore (Dasgupta *et al.*, 2014).

10 Without PfMyoA or PfELC, merozoites cannot strongly deform or internalise  
11 Conditional KO of PfMyoA showed an almost complete growth defect (Robert-Paganin *et al.*, 2019)  
12 and accordingly, PfMyoA-cKO parasites after RAP treatment showed zero successful invasion events  
13 (0/53) (Figure 5A). In all events recorded, PfMyoA-cKO + RAP showed no deformation or  
14 internalisation (Type D failure, Video S4). Since there was a complete block at deformation, this  
15 mutant cannot be used to probe the role of the motor in internalisation directly. For PfMyoA-comp  
16 parasites, the event types observed in DMSO- and RAP-treated parasites were slightly different, with  
17 a moderate drop in invasion success (from 68% to 52%) and corresponding increase in Type C  
18 failures ( $p=0.047$ ) (Figure 5A). However, there were no significant differences in deformation  
19 strength or phase timings suggesting that overall the PfMyoA-comp protein successfully  
20 complemented the function of the native protein (Figure 5B-C).

21 Having confirmed the importance of PfMyoA for merozoite force production, we next asked whether  
22 the weakened motor present in PfELC-cKO might reveal more about the phases of invasion that  
23 require actomyosin force. Like PfMyoA-cKO parasites, RAP-treated PfELC-cKO parasites did not  
24 achieve any successful invasions (0/113) (Figure 5A). However, 40% of PfELC-cKO events were able  
25 to deform the RBC (Type C events, Video S5). Though the deformation scores were significantly  
26 weaker ( $p<0.0001$ , mean shifted from 1.36 to 0.46), this shows that a partially functional motor can  
27 achieve inefficient deformation (Figure 6B). Importantly, no PfELC-cKO merozoites were able to  
28 initiate internalisation, supporting a critical role for PfMyoA in driving merozoite internalisation, as  
29 well as deformation, and suggesting that the process of internalisation has a higher energetic barrier  
30 than deformation.

31 PfMyoA drives invasion pore closure, while PfMyoA and PfMyoB both help initiation of internalisation  
32 Understanding the role of motor force during internalisation depends on finding intermediate-  
33 strength motor mutants able to initiate internalisation. Alone amongst the PfMyoA mutants  
34 PfMyoA-K764E merozoites could initiate invasion, though less efficiently, showing a marked increase

1 in Type B failures (Video S6), from 5% to 16%, as part of a significant disruption to event types  
2 ( $p < 0.0001$ , Figure 6A). Deformation was not significantly affected, but there was a notable (though  
3 only borderline significant) increase in the median duration of the pre-internalisation pause after  
4 RAP treatment, from 3.7 s to 10.7 s in Type A events (Figure 6C,  $p = 0.058$ ). In Type B events, this  
5 much longer pre-internalisation pause was also present, but in both DMSO- and RAP-treated  
6 parasites. This suggests that either a weaker motor or a more resistant RBC can delay the initiation  
7 of internalisation.

8 In contrast, internalisation itself was only significantly slowed in RAP-treated PfMyoA-K764E  
9 parasites undergoing Type B events, not Type A events (Figure 6C) (21 s, compared to 13.7 s for Type  
10 A events,  $p = 0.003$ ). Internalisation in DMSO-treated parasites undergoing Type B events was slightly  
11 slower than Type A (15 s vs 12 s), but to a much lesser extent. Therefore, only the combination of a  
12 weaker motor and a more resistant RBC resulted in strongly slowed internalisation. This may reflect  
13 slower motion during internalisation or an arrest at completion of internalisation.

14 Therefore, following RAP treatment, PfMyoA-K764E parasites are more likely to fail at initiation of  
15 internalisation (an increase in Type C failures, Figure 6A) and, when they can initiate it, they take  
16 longer to do so (a longer pre-internalisation pause, Figure 6C). Importantly, these parasites are also  
17 more likely to fail to complete internalisation (causing the increase in Type B failures, Figure 6A) and  
18 they take much longer to internalise when they fail, and slightly longer even when successful (Figure  
19 6C).

20 Having demonstrated the effect of a gradient of PfMyoA motor defects in invasion, we finally sought  
21 to test the role of PfMyoB in the invasion process. Video microscopy of RAP-treated PfMyoB-cKO  
22 parasites showed only a moderate reduction in successful invasion (from 91% to 77%,  $p = 0.045$ ,  
23 Video S7) and increase in Type C failures (from 6.0% to 17.5%) (Figure 6A), while the distribution of  
24 deformation scores was unchanged ( $p = 0.472$ ) (Figure 6B). The durations of some invasion phases  
25 were affected by PfMyoB-cKO. The pre-internalisation pause was more than doubled (from 3.3 s to  
26 7.5 s,  $p = 0.011$ ) and the pause post-internalisation was significantly reduced (from 40.3 s to 33.7 s,  
27  $p = 0.001$ ) by an amount roughly equal to the combined increases in duration of earlier phases (Figure  
28 6C).

29 While the overall defect in PfMyoB-cKO parasites was mild (a moderate increase in Type C failures),  
30 the significant delay in initiation of internalisation is consistent with a model of PfMyoB supporting  
31 the first stages of translocating the TJ. However, this role of PfMyoB, or any other, is clearly not  
32 required for internalisation. The shorter pause post-internalisation directly corresponds to the  
33 delays earlier in invasion, suggesting that the onset of echinocytosis falls at a set time after the

1 stimulus regardless of the timing of subsequent phases, an effect also seen in PfMyoA-K764E  
2 parasites and in a previous study (Weiss *et al.*, 2015).  
3 Therefore, while PfMyoB-cKO merozoites are delayed in initiation of internalisation, and PfMyoA-  
4 cKO and PfELC-cKO merozoites have insufficient force production to overcome the steps of  
5 deformation or internalisation, PfMyoA-K764E merozoites show a distinct defect at a third energetic  
6 barrier: completion of internalisation. These data therefore support a three-step model for the  
7 energetics of red blood cell entry by the merozoite: surface deformation; initiation of  
8 internalisation/entry; and completion of internationalisation/closure of the tight junction.

## 1 Discussion

2 PfMyoA-K764E moderately impairs invasion and may block gliding

3 By extending the conditional knockout platform developed for PfMyoA (Robert-Paganin *et al.*, 2019)  
4 to the auxiliary motor PfMyoB, the essential light chain PfELC and combining this with conditional  
5 complementation of PfMyoA, we have generated a series of malaria parasite motor mutants that  
6 show a range of defects in their ability to enter red blood cells. By investigating these defects by  
7 video microscopy we have revealed three different energetic barriers to invasion, each requiring  
8 some level of motor activity (Figure 7A).

9 For flexible expression of conditional *Pfmyoa* mutations, a distal expression site was developed at  
10 the *p230p* locus, dispensable for development throughout the life cycle (van Dijk *et al.*, 2010).  
11 PfMyoA-complementation and PfMyoA-K764E alleles were successfully integrated into the *p230p*  
12 locus, but other mutants affecting the *Pfmyoa* N-terminus, which have an equal or stronger impact  
13 on PfMyoA function *in vitro* (Robert-Paganin *et al.*, 2019), could not be generated after two  
14 transfection attempts. Expression of a second copy of *Tgmyoa* produces a strong down-regulation at  
15 the endogenous locus (Hettmann *et al.*, 2000; Meissner *et al.*, 2002; Herm-Götz *et al.*, 2007), which  
16 may explain the failure of transfections with moderately or strongly defective *Pfmyoa* alleles.

17 PfMyoA-K764E was confirmed to have a moderate phenotype after RAP treatment under static  
18 conditions while suspension conditions alleviated around 40% of the defect, consistent with the  
19 hypothesis that the interaction between phospho-S19 and K764 is critical only in stages where  
20 gliding is required (Robert-Paganin *et al.*, 2019). The culture conditions that best imitate physiological  
21 conditions are not clear, but suspension culture significantly affects invasion phenotypes and  
22 adhesin expression (Paul *et al.*, 2015; Awandare *et al.*, 2018; Nyarko *et al.*, 2020). The recent  
23 demonstration that merozoites exhibit actin-dependent gliding (Yahata *et al.*, 2020) might explain  
24 why PfMyoA-K764E had a stronger effect on static invasion, if merozoites first tune PfMyoA for  
25 gliding before S19 is dephosphorylated to tune the motor for invasion (Figure 7C). The extensive  
26 calcium ion signalling that regulates organelle secretion during merozoite invasion might modulate  
27 PfMyoA phosphorylation, since a calcium-dependent phosphatase, calcineurin, critically regulates  
28 merozoite attachment (Paul *et al.*, 2015; Philip & Waters, 2015). To assess the broader phospho-  
29 tuning hypothesis will require mutation of PfMyoA-S19 in merozoites and the fast gliding sporozoite,  
30 as well as direct assessment of the phosphorylation state of PfMyoA-S19 at each phase of invasion.

31 Deformation is the first step during invasion requiring PfMyoA force

32 By filming highly synchronised schizonts at high parasitaemia (~50%) and selecting only events that  
33 result in echinocytosis, large numbers of events can be captured by video microscopy. Though many

1 events where a merozoite attached but failed to form a TJ may be missed by this approach, around  
2 75% of successful invasion events result in echinocytosis (Weiss *et al.*, 2015), so a minority of  
3 successful invasion events will be missed. Since the focus of this study is on the later phases of  
4 invasion involving motor activity, this approach was deemed an acceptable compromise for the  
5 detection of a greater number of events.

6 Previous studies using chemical (Miller *et al.*, 1979; Weiss *et al.*, 2015) or genetic (Das *et al.*, 2017;  
7 Perrin *et al.*, 2018) inhibition of merozoite actomyosin have clearly shown that, without force  
8 production, merozoites cannot deform the RBC or begin internalisation. Biophysical modelling work  
9 has suggested that internalisation should present a third energetic barrier: transition from a  
10 "partially-wrapped" to "completely-wrapped" state at completion of internalisation (Dasgupta *et al.*,  
11 2014). However, the role of the actomyosin motor during internalisation has not been probed  
12 directly, due to the need for intermediate strength mutants that can overcome the earlier energetic  
13 barriers.

14 Consistent with these studies, PfMyoA-cKO merozoites were completely blocked in both  
15 deformation and internalisation. These two phases were almost completely restored in PfMyoA-  
16 comp parasites, confirming that these two energetic barriers require PfMyoA activity. As an aside,  
17 the slight fall in PfMyoA-comp invasion success in general may result from the use of altered codons  
18 or the absence of regulatory DNA sequences found beyond the 2 kb promoter sequence or in the  
19 two short *Pfmyoa* introns, omitted in the complementing allele.

20 Unlike PfMyoA-cKO, PfELC-cKO only reduced deformation, though it also blocked all internalisation,  
21 suggesting that the level of motor activity retained in PfELC-cKO parasites is very low, and that the  
22 energetic barriers downstream of deformation are higher. This agrees with the almost complete  
23 replication defect seen in PfELC-cKO parasites (Moussaoui *et al.*, *manuscript submitted*).

24 Deformation may help select a RBC with suitable biophysical properties for invasion (Weiss *et al.*,  
25 2015), and the completion of this selection process could act as a checkpoint, triggering signalling for  
26 secretion of TJ components, and for the proposed dephosphorylation of PfMyoA. It was previously  
27 reported that invasion failure correlated with weaker deformation (Weiss *et al.*, 2015). However, in  
28 the current study invasion failure correlated with stronger deformation. This is likely due to the  
29 exclusion of weaker merozoite contacts that did not lead to echinocytosis.

30 The second step, initiation of internalisation, is facilitated by both PfMyoA and PfMyoB  
31 Across the different mutants, a longer pause before internalisation correlated with reduced invasion  
32 success. For PfMyoB-cKO, this delay was the most striking defect during invasion, suggesting that the  
33 initiation of internalisation is when PfMyoB plays its role. Though unrelated to PfMyoB in sequence,

1 *T. gondii* MyoH shares the extreme apical localisation and is required for initial translocation of the  
2 TJ over the parasite apex, “handing over” to the TgMyoA motor complex (Graindorge *et al.*, 2016).  
3 PfMyoB could play a similar role to TgMyoH, though PfMyoB is not critical for invasion. Since PfMyoB  
4 was previously shown not to co-localise with the TJ during internalisation but instead stayed at the  
5 merozoite apex (Yusuf *et al.*, 2015), its functional role might be indirectly related to internalisation,  
6 either by contributing to the stability of the merozoite apex or the secretion of invasion ligands.

7 The fall in successful invasion in PfMyoB-cKO parasites, from 91% to 77%, was roughly consistent  
8 with the mild growth defect, with relative fitness falling to 93% per cycle and consistent with work  
9 showing that constitutive knockout of *P. berghei* MyoB has no defect throughout the life cycle (Wall  
10 *et al.*, 2019). Further insight into the function of PfMyoB may come from study of its light chains and  
11 other interaction partners. MLC-B, the one currently identified light chain, is very large like the  
12 PfMyoA regulatory light chain, MTIP. Unlike PbMyoB, PbMLC-B was resistant to knockout, so may  
13 perform an important structural function (Wall *et al.*, 2019).

14 Overall, the increased pause before internalisation appears to be a symptom of a weaker motor,  
15 confirming that initiation of internalisation is the second energetic barrier that requires PfMyoA  
16 motor activity, supported by PfMyoB motor activity. This seems to be the most common energetic  
17 barrier for merozoites to fail at, since Type C failures are by far the most common in DMSO-treated  
18 parasites.

19 Completion of internalisation is a third and final motor-dependent step

20 For the first time, we demonstrate a third energetic barrier at the completion of internalisation. In  
21 PfMyoA-K764E merozoites there was a trend towards slower internalisation and a striking, three-  
22 fold increase in the rate of merozoite ejection after apparently completing internalisation,  
23 suggesting that PfMyoA force production is required through to the end of invasion, for completion  
24 of internalisation.

25 Type B failures were identified in *P. falciparum* in AMA1-cKO parasites (Yap *et al.*, 2014) where this  
26 phenotype was suggested to result from failure to reseal the RBC membrane after entry. A  
27 comparable ejection of *T. gondii* tachyzoites was observed after depletion of cAMP-dependent  
28 kinase PKA, referred to as “premature egress” (Uboldi *et al.*, 2018) although the same behaviour was  
29 not reported in a PKA-cKO line in *P. falciparum* (Patel *et al.*, 2019). Translocation of the nucleus  
30 through the narrow TJ with the help of a posterior pool of actin was proposed to be a limiting factor  
31 for internalisation of *T. gondii* tachyzoites, with acto-myosin mutants pausing mid-internalisation at  
32 the point of nuclear entry (Del Rosario *et al.*, 2019). However, we did not observe a similar pause  
33 during merozoite internalisation, instead the defect observed in motor-impaired PfMyoA-K764E



1 parasites came later, after apparent completion of internalisation, so translocation of the nucleus is  
2 unlikely to depend on PfMyoA or PfMyoB. Instead, *P. falciparum* Myosin E (MyoE) might perform  
3 this role, since it was identified in a nucleus-associated proteome (Oehring *et al*, 2012) and *P.*  
4 *berghei* MyoE localises to the merozoite posterior (Wall *et al*, 2019). PbMyoE interacts with multiple  
5 members of the PbMyoA motor complex (Fang *et al*, 2018) and genetic deletion of PbMyoE impaired  
6 sporozoite entry to the mosquito salivary glands (Wall *et al*, 2019), consistent with PfMyoE  
7 supporting PfMyoA during invasion. Future experiments targeting this motor specifically will be  
8 required to define its precise function.

9 As predicted by biophysical modelling (Dasgupta *et al*, 2014) PfMyoA appears to support closure of  
10 the invasion pore behind the merozoite. Careful observation of *T. gondii* tachyzoites at the  
11 completion of internalisation revealed that twisting motility was required for efficient closure of  
12 invasion pore (Pavlou *et al*, 2018). This twisting could also be employed by *Plasmodium* merozoites.  
13 A recent study demonstrated helical motility of *P. knowlesi* merozoites on a substrate (Yahata *et al*,  
14 2020). In a similar fashion, we observed a “swirling” motion by *P. falciparum* merozoites both before  
15 internalisation and after ejection (Videos S6, S8). Though the twisting motility in tachyzoites was not  
16 TgMyoA-dependent (Pavlou *et al*, 2018) our observations of PfMyoA-K764E merozoites suggest that  
17 PfMyoA has a role in driving completion of internalisation, possibly by driving closure of the invasion  
18 pore.

19 In summary, this study has used conditional knockouts to dissect the roles played by parasite myosin  
20 motors during the process of red blood cell invasion and developed a model of three sequential  
21 energetic barriers that require active actomyosin force. Successively stronger defects in the PfMyoA  
22 motor complex point to roles for the motor at deformation and at initiation and completion of  
23 internalisation. Meanwhile, though PfMyoB is clearly not critical for invasion, it seems to support  
24 timely initiation of internalisation. Future work will be required to understand the effect of variation  
25 in red blood cell biophysical properties, the parasite effectors that manipulate RBC properties and  
26 how motor force is regulated to rapidly and efficiently power the steps of merozoite invasion, the  
27 first stage in the development of malaria pathogenesis.

28

## 29 **Acknowledgements**

30 This work was funded by Wellcome through an Investigator Award to J.B. (100993/Z/13/Z), the  
31 Human Frontier Science Program (RGY0066/2016 to J.B.) and a PhD studentship to T.C.A.B.  
32 (109007/Z/15/A). We thank Anne Houdusse, Dihia Moussaoui and Julien Robert-Paganin for sharing  
33 pre-publication structures for the complete PfMyoA complex. We thank Kathrin Witmer for help

1 with design of constructs. We thank Mike Blackman for generous provision of the B11 line, David  
2 Baker for provision of the ML10 inhibitor and Marcus Lee for provision of CRISPR/Cas9 plasmids.

3

#### 4 **Author Contributions**

5 All authors were involved in conceptualization and writing of the manuscript. T.C.A.B. and S.H.  
6 conducted experiments. T.C.A.B. carried out formal analysis. J.B. supervised and acquired funding for  
7 the project.

8

#### 9 **Declaration of interests**

10 The authors declare no competing interests.

11

12

## 1 Figure titles and legends

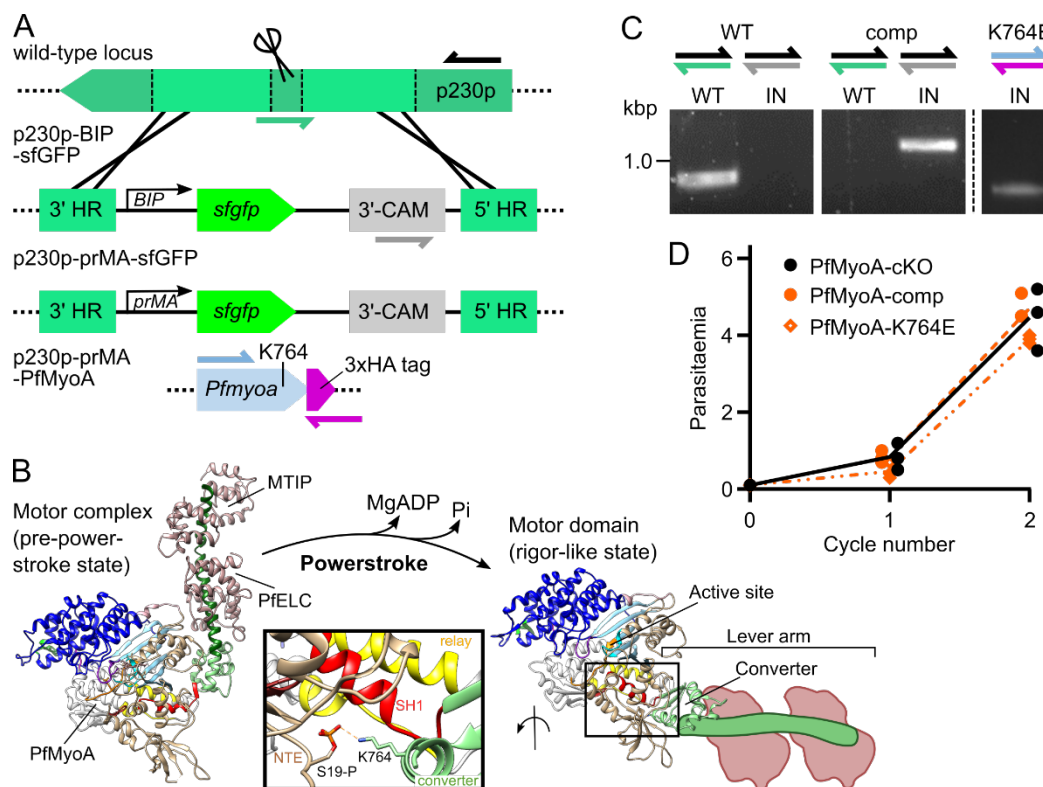

2

3 Figure 1: Development of a conditional knockout and complementation system for *Plasmodium*  
4 myosins

5 **A** Schematic of the modified *p230p* locus. The p230p-BIP-sfGFP repair template introduces *sfGFP*  
6 under a constitutive *BIP* promoter. The *BIP* promoter is exchanged for the *PfmyoA* promoter,  
7 forming p230p-prMA-sfGFP, with *sfGFP* exchanged for 3xHA-tagged *PfmyoA* forming PfMyoA-comp  
8 or PfMyoA-K764E. **B** Myosins produce force during a powerstroke, where conformational changes  
9 from ATP hydrolysis are communication by a relay (yellow) and SH1 (red) helices to the converter, to  
10 swing the lever arm. The SH1 helix in PfMyoA is unusually immobile and additional interactions are  
11 needed to stabilise the rigor-like state. Stabilising residues include those between phospho-S19 in  
12 the N-terminal extension (NTE, brown) and K764 in the converter (green). PPS structure from  
13 (Moussaoui *et al*, manuscript submitted); Rigor-like structure (PDB: 6I7D, neck region and light chain  
14 outlines added as schematic, by extension of the last helix of the converter). **C** Genotyping PCR of  
15 PfMyoA-comp and PfMyoA-K764E lines confirmed that the WT *p230p* locus (green half arrow) is  
16 completely lost in PfMyoA-comp, while the integrated locus (IN, grey half arrow) is present. **D**  
17 PfMyoA-comp parasites grow at the same rate as the parental PfMyoA-cKO line, while PfMyoA-  
18 K764E parasites grow slightly slower over 96 h. Lines show mean parasitaemia, N=3, each  
19 experiment in triplicate.

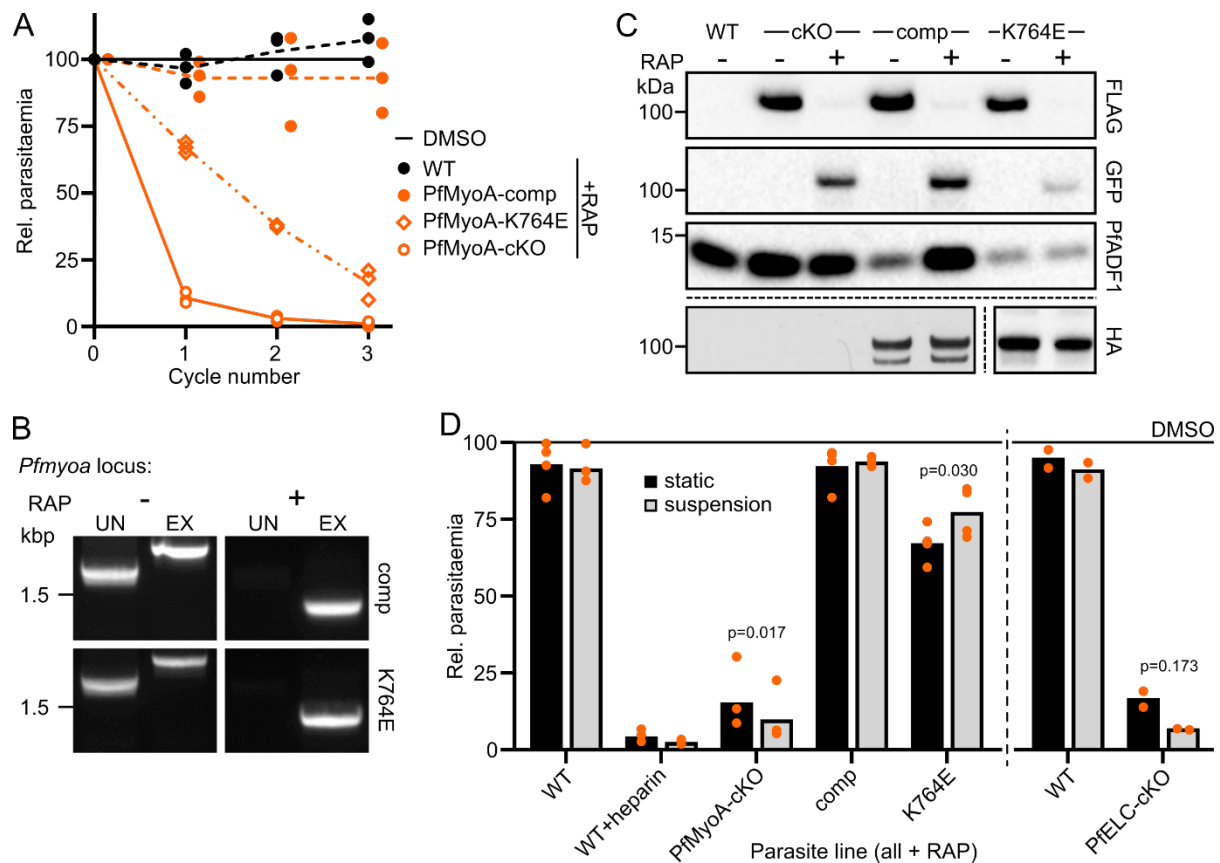

1

2 Figure 2: Conditional complementation and mutagenesis of PfMyoA

3 **A** RAP treatment of PfMyoA-comp and PfMyoA-K764E show that the complementing line has no  
4 growth defect, while the RAP-treated K764E line grows at around 55% of DMSO-treated control per  
5 cycle under static conditions. **B** Genotyping PCR of the endogenous *Pfmyoa* locus in PfMyoA-comp  
6 and PfMyoA-K764E after RAP treatment shows that the replacement of the unexcised, integrated  
7 allele (IN) with the excised allele (EX) is almost complete. **C** Western blot of WT, PfMyoA-cKO,  
8 PfMyoA-comp and PfMyoA-K764E schizonts confirms that PfMyoA-FLAG, expressed from the  
9 endogenous *Pfmyoa* locus, is almost completely lost in favour of truncated PfMyoA-GFP. PfMyoA-  
10 3xHA, expressed at the ectopic locus, is unaffected by RAP treatment. **D** Parasites were treated with  
11 DMSO or RAP and cultured under static or suspension conditions. Parasitaemia was then measured  
12 in the following cycle by flow cytometry and normalised to DMSO control for each line and  
13 condition, showing that suspension conditions partially alleviate the growth defect caused by K764E  
14 mutation, from 67% of DMSO-treated to 77%. Bars show mean parasitaemia, N=4 (or 2 for PfELC-  
15 cKO, tested separately), each experiment in triplicate. Significance assessed by paired t test, two  
16 tailed.

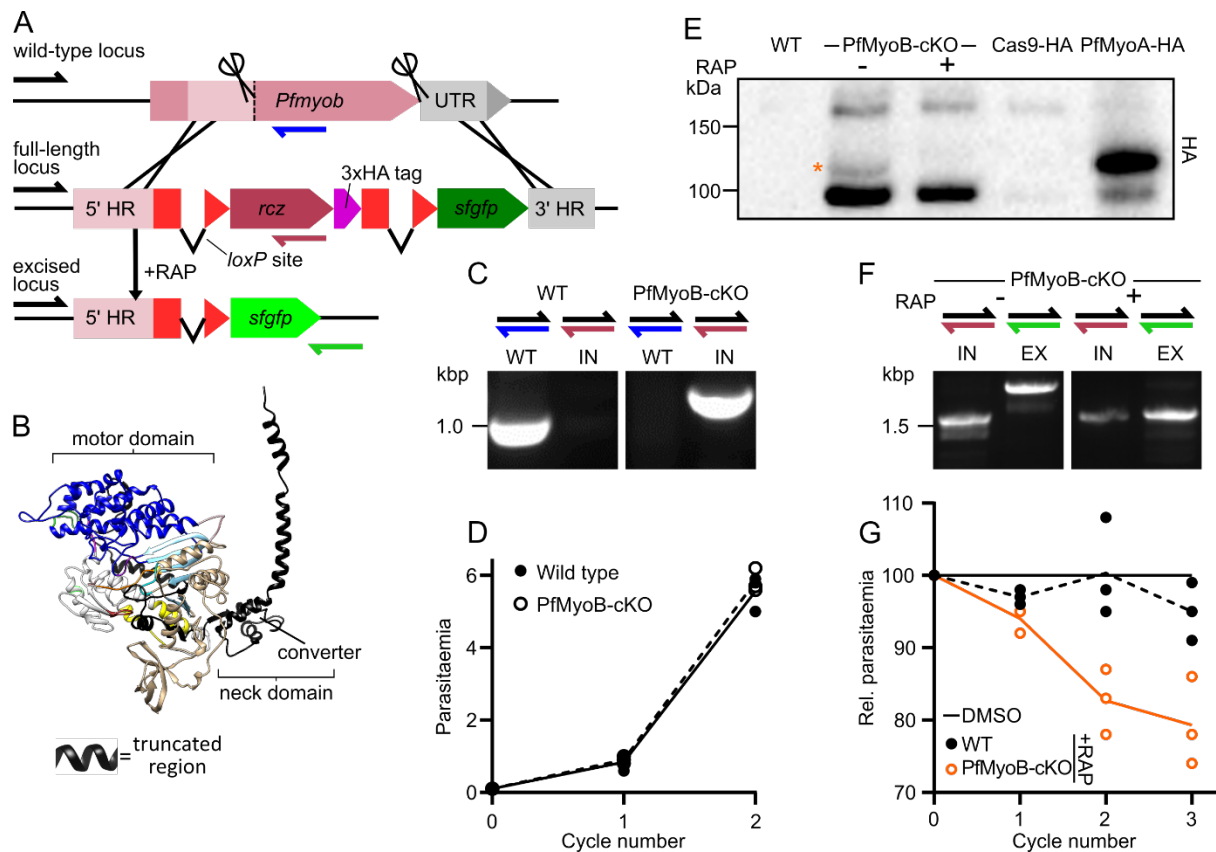

1

2 Figure 3: Disruption of PfMyoB produces a mild parasite growth defect

3 **A** Schematic showing generation of a PfMyoB-cKO targeting construct. A region of *PfmyoB* encoding  
 4 the C-terminal 204 residues was synthesised with re-optimised codons (*rcz*) and a 3xHA tag, and is  
 5 placed between two *loxPint* modules, with *sfgfp* out-of-frame downstream. Guide RNA sites  
 6 (scissors) and homology regions were chosen to start as close as possible to the start and end of the  
 7 modified region. **B** A structural model of PfMyoB indicating the region excised in PfMyoB-cKO (in  
 8 black). **C** Genotyping PCR confirms that transfectants contain only the integrated locus (IN, purple  
 9 half arrow), while the WT locus (blue half arrow) is completely lost. **D** Growth of PfMyoB-cKO  
 10 parasites over 96 h is no different to the parental, DiCre-expressing, B11 line. Line shows mean  
 11 parasitaemia, N=3, each experiment in triplicate. **E** Western blot analysis of WT, PfMyoB-cKO or  
 12 Cas9-3xHA-expressing controls (where Cas9 was the only 3xHA-tagged protein or PfMyoA-3xHA was  
 13 also expressed). In all lanes with PfMyoB-cKO or Cas9-3xHA-expressing controls a band around the  
 14 expected size of Cas9-3xHA (168 kDa) and a presumed Cas9-3xHA breakdown product (~95 kDa) is  
 15 observed. In PfMyoB-cKO+DMSO, but not +RAP, a slightly larger band is detected around the  
 16 expected size for PfMyoB-3xHA (97 kDa), confirming that PfMyoB-3xHA is properly expressed and  
 17 lost after RAP treatment. The PfMyoB-3xHA band runs at a similar size to PfMyoA-3xHA control (96  
 18 kDa). **F** Genotyping PCR shows the loss of much of the integrated, unexcised locus (IN, purple half  
 19 arrow) after RAP treatment and detection of the excised locus (EX, green half arrow). **G** Measuring  
 20 the parasitaemia of PfMyoB-cKO parasites in each of the three cycles following RAP treatment shows  
 21 a small, steady growth defect, of 93% on average. Lines show mean parasitaemia, normalised to  
 22 DMSO for each line/cycle. N=3, each experiment in triplicate.

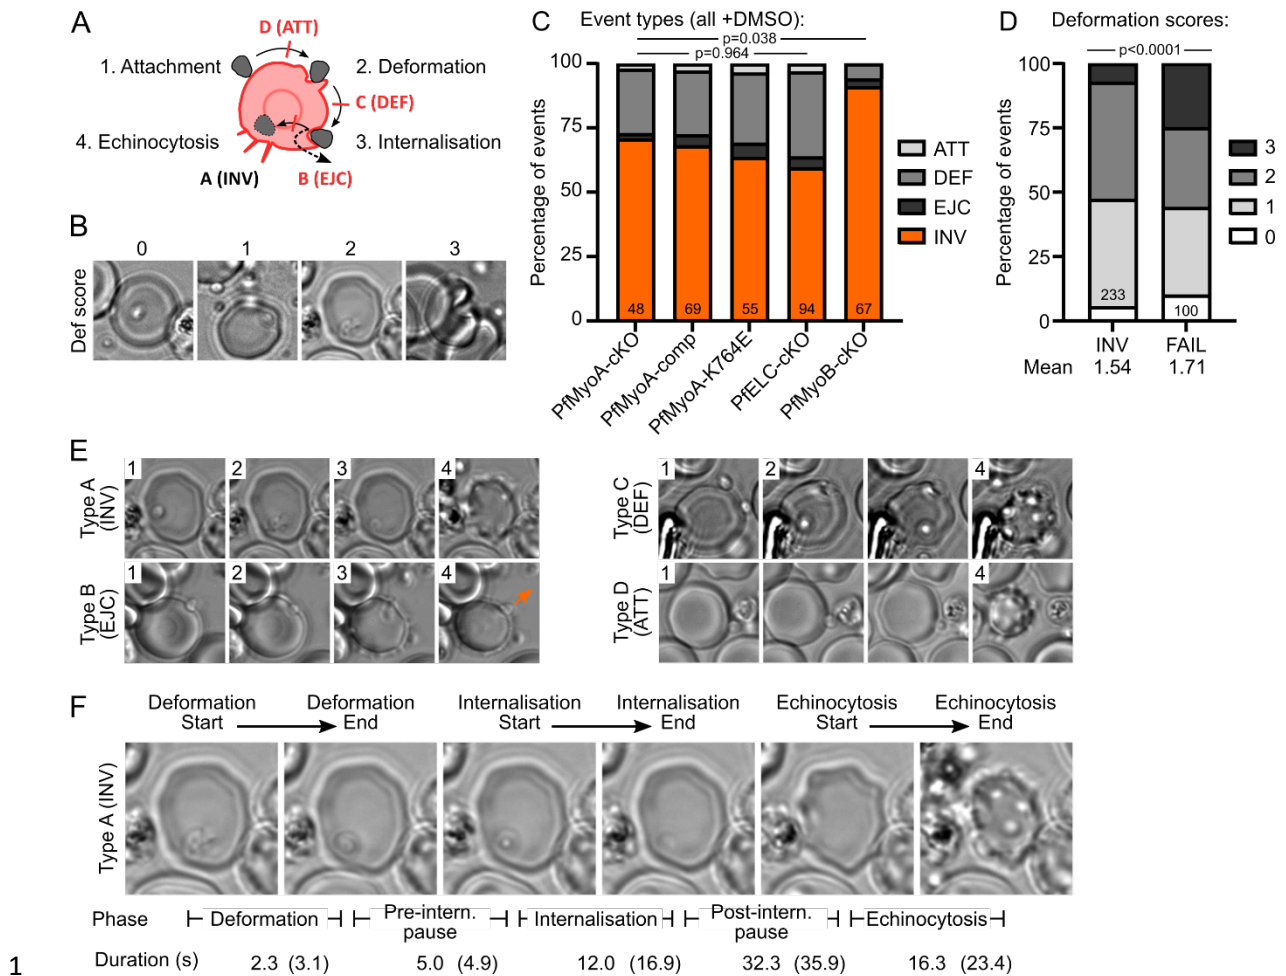

2 Figure 4: Video microscopy of merozoite invasion

3 **A** Schematic of merozoite invasion. Invasion comprises attachment to the RBC, deformation of the  
4 RBC membrane, internalisation of the merozoite and RBC echinocytosis. Invasion attempts are  
5 classified as successful (Type A) or by the phase of failure (Type B-D). **B** Each event was assigned a  
6 score based on the intensity of RBC deformation, from 0 (no deformation) to 3 (severe deformation).  
7 **C** Event types in videos from each line after DMSO treatment. While the distribution of events is not  
8 significantly different in PfMyoA or PfELC-cKO lines, PfMyoB-cKO shows significantly more successful  
9 invasion. Videos pooled from two independent experiments, each in duplicate. Numbers indicate  
10 total videos. Significance assessed by chi-square test, either each PfMyoA/PfELC line separately, or  
11 PfMyoB-cKO vs others pooled. **D** Deformation scores from all DMSO-treated lines separated by  
12 successful invasion (INV) or any type of failure (FAIL) reveal a significant increase in strong  
13 deformation in failed events. Numbers indicate total videos. Significance assessed by chi-square test.  
14 **E** Examples of each event type, with the numbers indicating the phase of invasion shown in that  
15 image (numbers from **A**). (For Type B event, see [Video S6](#); for Type D event, see [Video S4](#)). **F** For  
16 Type A and Type B events, the start and end of deformation, internalisation and echinocytosis were  
17 timed, leading to the five intervals shown. The median times from Type A events across all lines after  
18 DMSO treatment is shown, with overall agreement to published values ((Gilson & Crabb, 2009) in  
19 brackets).



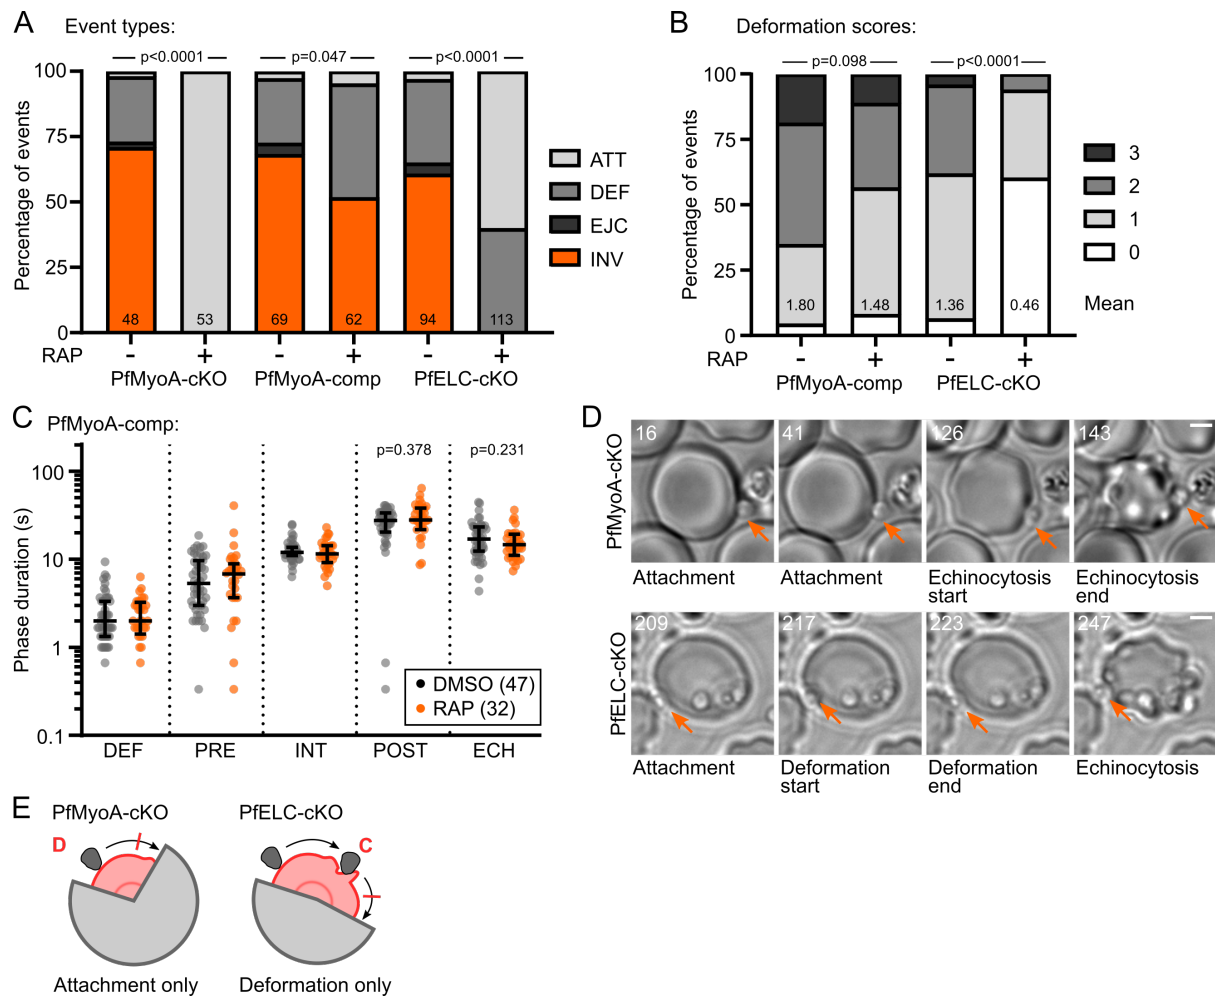

1

2 Figure 5: In the absence of PfMyoA or PfELC, merozoites cannot strongly deform or internalise

3 **A** Comparison of event types from PfMyoA-cKO, PfMyoA-comp and PfELC-cKO lines after DMSO and  
4 RAP treatment. PfMyoA-cKO parasites show neither deformation nor internalisation after RAP  
5 treatment ( $p < 0.0001$ , significance assessed by Fisher's exact test comparing pooled failures to Type  
6 A events). In contrast, PfMyoA-comp shows only a slight drop in the rate of successful invasion after  
7 RAP treatment ( $p = 0.047$ ). PfELC-cKO parasites also shows a complete loss of successful invasion, but  
8 almost half of the events did involve deformation. Significance assessed by chi-square test. **B** The  
9 distribution of deformation scores does not change significantly for PfMyoA-comp events after RAP  
10 treatment. The mean deformation score for PfELC-cKO merozoites is greatly reduced by RAP  
11 treatment. Significance assessed by chi-square test. **C** Comparing the duration of each phase of  
12 invasion for PfMyoA-comp parasites after DMSO or RAP treatment shows no significant differences.  
13 **D** Examples of RAP-treated PfMyoA-cKO merozoite, showing attachment only, with no further  
14 progress (Video S4), and a PfELC-cKO merozoite undergoing a Type C failure, showing deformation  
15 but no internalisation (Video S5). Time indicated in seconds, scale bar 2  $\mu\text{m}$ . **E** Schematic based on  
16 Figure 4A showing invasion attempts by PfMyoA-cKO merozoites arrest after attachment, while  
17 invasion attempts by PfELC-cKO merozoites arrest after deformation, though many arrest before  
18 deformation as well.



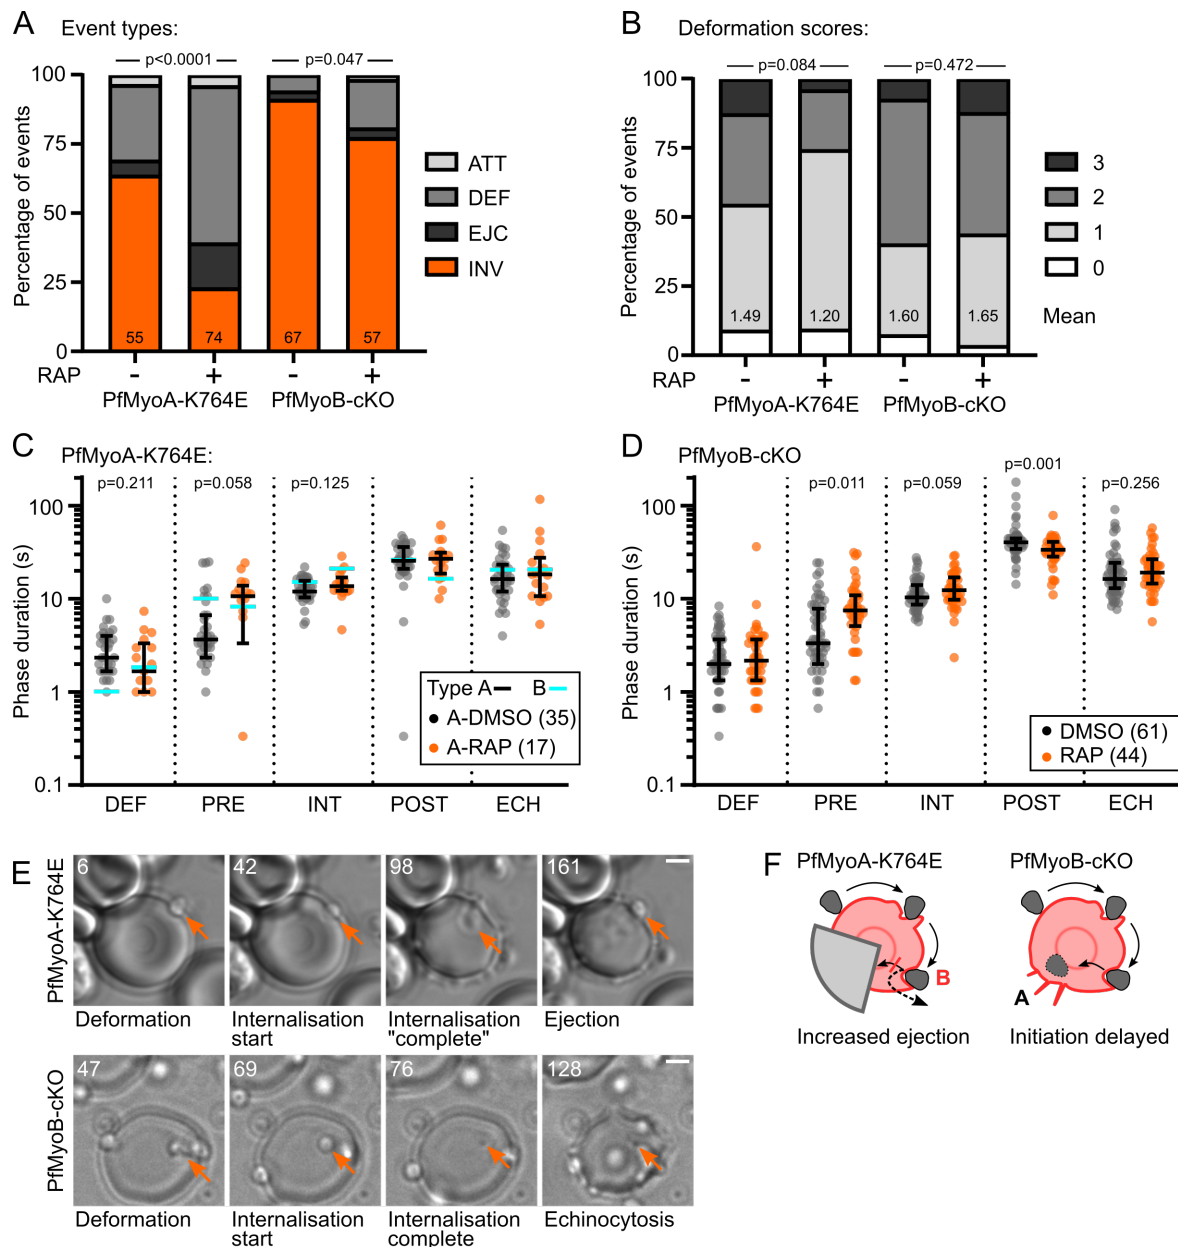

1

2 Figure 6: PfMyoA drives invasion pore closure, while PfMyoA and PfMyoB both help initiation of  
3 internalisation

4 **A** RAP treated PfMyoA-K764E parasites showed a significantly shifted distribution of event types,  
5 with more Type B and Type C events. This is consistent with these parasites having insufficient motor  
6 function to overcome a third barrier, at completion of internalisation. Significance assessed by chi-  
7 square test. PfMyoB-cKO parasites showed a significant increase in Type C failures, consistent with  
8 an impairment at initiation of internalisation. Significance assessed by Fisher's exact test, comparing  
9 successful invasion to pooled invasion failures. **B** PfMyoA-K764E parasites show a slight weakening  
10 of deformation, though not significant. There is no difference between the deformation scores in  
11 PfMyoB-cKO parasites after RAP treatment. Significance assessed by chi-square test. **C** For PfMyoA-  
12 K764E parasites undergoing Type A events (black bars and data points) RAP treatment induces a  
13 longer pause pre-internalisation. Only in Type B events (cyan bars) after RAP treatment is  
14 internalisation significantly slower and the pause post-internalisation shorter. Bars show median and

1 interquartile range, or median only for Type B events. Significance assessed between Type A DMSO  
2 and RAP treatments by Mann-Whitney test, shown when  $p < 0.5$ . **D** The duration of pre-  
3 internalisation pause is significantly increased in PfMyoB-cKO parasites, suggesting that PfMyoB  
4 plays a role in initiation of internalisation. The post-internalisation pause is reduced by a similar  
5 amount. Bars show median and interquartile range. Significance assessed by Mann-Whitney test,  
6 shown when  $p < 0.5$ . **E** Example of a RAP-treated PfMyoA-K764E merozoite, undergoing a Type B  
7 failure, showing apparent completion of internalisation before subsequent ejection (Video S6), and a  
8 PfMyoB-cKO merozoite undergoing successful invasion (Video S7). Time indicated in seconds, scale  
9 bar 2  $\mu\text{m}$ . **F** Schematic based on Figure 4A showing that PfMyoA-K764E merozoites can proceed to  
10 internalisation, but are frequently ejected, while PfMyoB-cKO merozoites invade successfully, but  
11 with delayed initiation of internalisation.

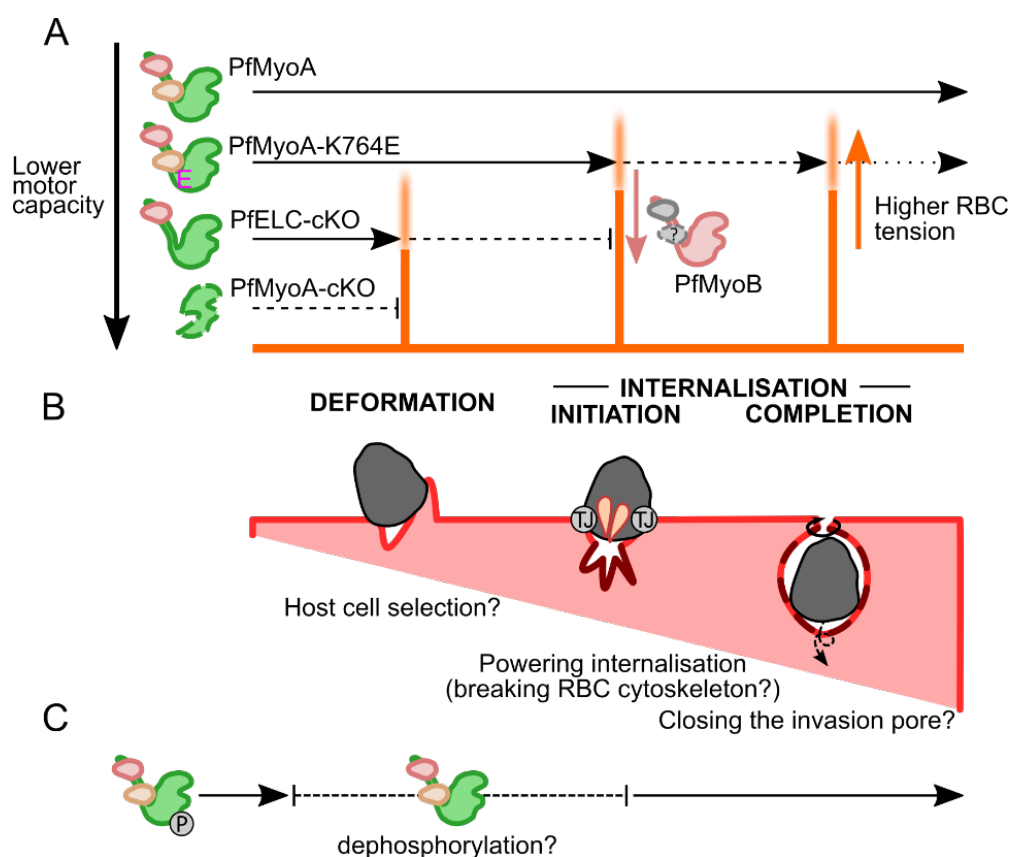

1

2 Figure 7: A stepwise model for *Plasmodium* myosin force generation during merozoite invasion

3 **A** PfMyoA produces force at three sequential energetic barriers to drive invasion. Successively more  
 4 disruptive mutations bring the PfMyoA force production capacity closer to, or below, the energetic  
 5 barriers, represented by orange bars with blurred tops indicating variability in individual parasites  
 6 and RBCs. Some PfMyoA-K764E parasites fail at initiation of internalisation (Type C failures), some  
 7 fail at completion of internalisation (Type B failures) and relatively few complete invasion. PfELC-cKO  
 8 parasites often fail at the barrier of deformation (Type D failures), though some can deform and fail  
 9 at initiation of internalisation (Type C failures). PfMyoA-cKO parasites never overcome the energetic  
 10 barriers to deformation or internalisation. PfMyoB-cKO parasites are only impaired at initiation of  
 11 internalisation, suggesting that PfMyoB may act to reduce the energetic barrier at initiation of  
 12 internalisation. **B** Overview of actomyosin functions at each of the three steps, including using  
 13 deformability to select suitable host cells, driving initial wrapping of the merozoite and twisting shut  
 14 the invasion pore. Parasite effectors reduce the energetic barriers by modulating RBC biophysical  
 15 properties, including creation of the tight junction (TJ) to introduce a line tension, insertion of  
 16 membrane material (darker membrane) and binding of adhesins like EBA-175 that may affect RBC  
 17 lipid packing **C** PfMyoA is phosphorylated before egress and may be dynamically dephosphorylated  
 18 at some point before internalisation to tune the motor for maximal force production.

## 1 Methods

### 2 Software for DNA sequence analysis and protein structure prediction

3 DNA constructs were designed using Benchling (benchling.com) and guide RNAs using CHOPCHOP  
4 (Labun *et al.*, 2019). Protein structure predictions were generated using Phyre2 (Kelley *et al.*, 2015)  
5 and models were visualised using UCSF Chimera (Pettersen *et al.*, 2004).

### 6 DNA manipulation

7 PCR was carried out according to the manufacturer's protocols using Phusion polymerase (NEB), or  
8 Advantage 2 Polymerase mix (Takara Bio) for amplification of UTRs and *Pfmyob*, and constructs were  
9 assembled by Gibson assembly with DNA inserts in a 1:3 molar ratio. For transfections, plasmids  
10 were purified from 100 ml of overnight culture using a plasmid maxiprep kit (Qiagen). Before  
11 transfection, plasmids were purified by ethanol precipitation (with 0.1 vol 3M sodium acetate pH  
12 5.2, 1.5 vol 100% ethanol), washed in 70% ethanol, air dried and resuspended in TE buffer (10 mM  
13 Tris-HCl, 1 mM EDTA, pH 8.0).

14 For modification of the *p230p* locus in the PfMyoA-cKO background, targeting and repair constructs  
15 were modified from (Ashdown *et al.*, *in press*). The targeting construct, pDC2-p230p-hDHFR,  
16 (originally adapted from (White *et al.*, 2019)) carries 3xHA-tagged Cas9 and the *p230p*-targeting  
17 guide RNA. This was modified by excising *hdhfr* with NcoI/SacII and ligating in *bsd* to form pDC2-  
18 p230p-BSD. The *bsd* sequence was amplified from pB-CBHALO (Stortz *et al.*, 2019), with the N-  
19 terminal sequence modified to MAK during amplification, to match a consensus sequence (Mesén-  
20 Ramírez *et al.*, 2016). The p230p-BIP-sfGFP repair plasmid (pkiwi003, Ashdown *et al.*, *in press*) was  
21 modified to excise the BIP promoter by SacII/NheI digestion, and ligation of a 2.0 kbp region directly  
22 upstream of *Pfmyoa* (roughly 2/3 of the intergenic region) to form p230p-prMA-sfGFP. The *Pfmyoa*  
23 cds with 3xHA-tag was generated synthetically (GeneART) with altered codons and ligated into  
24 p230p-prMA-sfGFP after NheI/PstI digestion to form p230p-prMA-PfMyoA. K764E, S19A or ΔN  
25 mutants were generated by site-directed mutagenesis.

26 PfMyoB-cKO was generated using the same two plasmid CRISPR/Cas9 system, with guide RNAs  
27 chosen to target the start of each of the upstream and downstream homology regions. pDC2-cam-  
28 co.Cas9-U6.2-hDHFR (White *et al.*, 2019) was digested with BbsI and annealed guide RNA  
29 oligonucleotides were ligated into the pDC2 backbone, forming pDC2-PfMyoB-hDHFR-1 or -2. The  
30 repair plasmid was designed like the PfMyoA-cKO construct (Robert-Paganin *et al.*, 2019), but  
31 without the SLI machinery and constructed from a generic pUC19 backbone. The *loxPint* modules  
32 flanked the 611 bp codon-optimised region (*rcz*) and 3xHA tag, and this was synthesised with the  
33 downstream *sfgfp* (GeneART) and assembled with upstream and downstream homology regions of

1 671 bp and 881 bp amplified from genomic DNA. The sites targeted by the two guide RNAs were  
2 altered in the rcz region, so no additional shield mutations were required.

### 3 Parasite culture and transfection

4 *P. falciparum* strains B11 (Perrin *et al.*, 2018) and PfMyoA-cKO (Robert-Paganin *et al.*, 2019) were  
5 cultured in complete culture media (CCM) comprising RPMI 1640 (Life Technologies) supplemented  
6 with 0.5% w/v Albumax-II (Gibco) under standard conditions (Trager & Jensen, 1976). Parasites were  
7 cultured at 4% haematocrit (using human O+ RBCs) and synchronised with 5% sorbitol (Sigma). For  
8 transfection, parasites were grown to 5% at ring-stage and electroporated with 50 µg of each of the  
9 targeting and repair plasmids (or 25 µg each for the two targeting plasmids for PfMyoB-cKO).  
10 Purified plasmids were resuspended in a total volume of 50 µl of TE buffer (pH 8.0) added to 350 µl  
11 sterile cytomix buffer (Adjalley *et al.*, 2010). Plasmid uptake was selected for by adding fresh 2.5 nM  
12 WR99210 (Jacobus Pharmaceutical) or 5 µg/ml blasticidin (Sigma) for 5 days, then parasites were  
13 returned to drug-free media and media changed every 2-3 days until parasite population re-  
14 established. Genomic DNA was extracted using the PureLink genomic DNA mini kit (Invitrogen) and  
15 diluted to 10 ng/µl.

### 16 Parasite growth assays

17 To test growth rates before RAP treatment, transgenic lines and parental parasites were  
18 synchronised at early rings, seeded at 200 µl in 96-well plates at 0.1% parasitaemia, 2% haematocrit  
19 and incubated for ~72 h until the middle of the following cycle. 20 µl was taken for quantification by  
20 flow cytometry, then the media was changed, and parasites incubated for a further 24 h before  
21 quantification at the start of cycle 2 (after ~96 h).

22 To test the phenotypes of RAP-treated parasites, ring stage parasites (4 h post-invasion) were  
23 synchronised with sorbitol and 0.05% DMSO or RAP (Sigma, 100 nM in DMSO, except PfELC-cKO: 200  
24 nM) was added for 16 h. Cultures were washed twice in CCM and 200 µl dispensed in triplicate in 96  
25 well plates at 1% parasitaemia, 0.3% haematocrit, with heparin-treated WT parasites (1:25, Pfizer) as  
26 a control. In each of the following three cycles, 100 µl was taken for flow cytometry and the  
27 remainder was diluted to 1% parasitaemia and incubated further. At the end of the first cycle, (~40 h  
28 post-treatment), samples were taken for genotyping and Western blot analysis. For comparison of  
29 phenotypes under suspension and static conditions, after incubation with DMSO or RAP cultures  
30 were plated out in triplicate in 48 well plates in 150 µl at 5% haematocrit, 1% parasitaemia. This  
31 small volume supports consistent suspension of the culture. Identical plates were prepared and one  
32 incubated in a static incubator, the other incubated in a humidified box on a platform shaking at 185  
33 rpm. 72 h post-treatment, 8 µl of culture was transferred to a 96 well plate and quantified by flow  
34 cytometry.

1 For flow cytometry analysis, 100  $\mu$ l of parasites at 0.3% haematocrit was added to a 96 well plate  
2 and stained with SYBR Green I (Sigma, 1:5000) in 100  $\mu$ l (15 minutes, room temperature) then  
3 washed three times in PBS and resuspended in 100-150  $\mu$ l PBS for quantification. Flow cytometry  
4 was performed using a LSRFortessa cytometer (BD Biosciences) with high throughput sampler, with  
5 capture of 100,000 events per well. Samples were gated for RBCs, single cells then SYBR+ cells (Fig  
6 SX) and data were analysed using FlowJo (BD Biosciences), with each sample normalised to DMSO-  
7 treated control in each cycle.

#### 8 Microscopy analysis of parasites

9 For live fluorescence microscopy, late schizonts of prMA-GFP were stained with DRAQ5 DNA stain  
10 (Thermo Fisher, 5  $\mu$ M, 30 minutes). The culture was resuspended in PBS for imaging, at a final  
11 haematocrit of 0.5%. 200  $\mu$ l was added to a well of an 8-well imaging slide (Ibidi, untreated) and  
12 allowed to settle. Images were acquired with an OrcaFlash 4.0 CMOS camera using a Nikon Ti  
13 Microscope (Nikon Plan Apo 60x or 100x 1.4-N.A. oil immersion objectives). Subsequent image  
14 manipulations were carried out in Fiji (Schindelin *et al.*, 2012, 2015).

15 For video microscopy, DMSO and RAP-treated parasites were incubated for  $\sim$ 40 h, then schizonts  
16 were isolated on gradients of 70% Percoll (Radfar *et al.*, 2009) then washed in 10 ml CCM and the  
17 pellet size estimated. Isolated schizonts (>90% parasitaemia) were resuspended to 1% haematocrit  
18 in CCM and treated with egress inhibitor ML10 (Baker *et al.*, 2017) at 1  $\mu$ M for 3-5 h to synchronise at  
19 very late schizonts. Once mature, the culture was resuspended in CCM with fresh RBCs at 0.2%  
20 haematocrit,  $\sim$ 50% parasitaemia. One at a time, samples were washed four times in warm CCM then  
21 resuspended in PBS for imaging and 200  $\mu$ l added to an 8-well imaging slide and allowed to settle at  
22 37°C. Samples were imaged using a Nikon Ti Microscope, 60x objective, enclosed within a heated  
23 incubation chamber, using a field of view with moderate density of cells. Egress begins 10-15  
24 minutes after the final wash, and a 10-minute brightfield video (3 fps) was captured once a small  
25 fraction of schizonts had already egressed, to capture the most events. Immediately before and after  
26 the brightfield video, one frame of GFP fluorescence was also captured to assign schizonts as GFP+  
27 or GFP-.

28 To quantify individual invasion attempts, each individual RBC that underwent echinocytosis was  
29 processed using Fiji. Invasion attempts were assigned to an event type based on successful invasion  
30 (merozoite clearly internalised, Type A), failed completion of internalisation (merozoite fully  
31 internalised, but ejected before the end of the video, Type B), failed initiation of internalisation  
32 (merozoite deforms RBC but is not internalised, Type C) or failed deformation (merozoite stably  
33 attached but does not deform or enter RBC, Type D). Deformation scores were assessed using the

1 scheme of (Weiss *et al.*, 2015), using a score of 0 to indicate no deformation and judging only the  
2 final deformation before invasion (if present).

3 For successful invasion and Type B failures, the phases of invasion were timed using an adjusted  
4 scheme from (Gilson & Crabb, 2009), starting from the first deformation (or stable attachment if no  
5 deformation present) and including end of deformation, start and end of internalisation and the  
6 start and maximal extent of echinocytosis. Events were excluded from analysis if any of the phases  
7 were obscured by other cells, the edge of the frame or the start or end of the video. RAP-treated  
8 parasite events were excluded if GFP-, except for PfELC-cKO which did not express GFP after  
9 truncation.

## 10 Protein and immunochemistry techniques

11 For Western blot analysis, 5-10 ml of schizonts at <5% parasitaemia were lysed using 0.1%  
12 saponin/PBS (Sigma) for 10 min (room temperature), washed twice in PBS and lysed using RIPA  
13 buffer (Thermo Fisher). PfMyoB-cKO parasites were treated with E64 (Sigma, E3132) at 10  $\mu$ M for 4-  
14 6 h to obtain as mature as possible schizonts before lysis. Parasite lysates were spun to isolate the  
15 soluble fraction (15000xg, 10') and the supernatant was boiled with SDS for 5 min. When indicated,  
16 protein concentration was normalised between samples using the Pierce BCA protein assay kit  
17 (Thermo Fisher) before addition of SDS buffer. Samples were separated by SDS-PAGE using 4-12%  
18 Bis-Tris gels in MES buffer (Thermo Fisher) then stained with Coomassie or dry-transferred to a  
19 nitrocellulose membrane (iBlot2, Thermo Fisher) for Western blot. Blots were blocked and stained in  
20 3% skimmed milk powder/PBST (0.1% Tween-20 in PBS), using anti-FLAG (1:2000, F1804, Sigma),  
21 anti-GFP (1:500, 7.1/13.1, Roche), anti-3xHA (1:2000, 12CA5, Roche or 1:4000, C29F4, Cell Signaling)  
22 anti-PfALD (1:1000, (Baum *et al.*, 2006)), or anti-PfADF1 (1:2000, (Wong *et al.*, 2011)) and HRP-  
23 coupled goat anti-mouse or -rabbit secondary antibody (1:5000, STAR120P/STAR121P, Bio-Rad).  
24 Blots were washed in PBST and detected using ECL reagent (Amersham) and exposure to X-ray film  
25 or ChemiDoc imaging system (Bio-Rad).

26

## 27 References

28 Adjalley SH, Lee MCS & Fidock DA (2010) A method for rapid genetic integration into Plasmodium  
29 falciparum utilizing mycobacteriophage Bxb1 integrase. *Methods Mol. Biol.* **634**: 87–100  
30 Alam MM, Solyakov L, Bottrill AR, Flueck C, Siddiqui FA, Singh S, Mistry S, Viskaduraki M, Lee K, Hopp  
31 CS, Chitnis CE, Doerig C, Moon RW, Green JL, Holder AA, Baker DA & Tobin AB (2015)  
32 Phosphoproteomics reveals malaria parasite Protein Kinase G as a signalling hub regulating  
33 egress and invasion. *Nat. Commun.* **6**: 7285



- 1 Andenmatten N, Egarter S, Jackson AJ, Jullien N, Herman J-P & Meissner M (2013) Conditional  
2 genome engineering in *Toxoplasma gondii* uncovers alternative invasion mechanisms. *Nat.*  
3 *Methods* **10**: 125–7
- 4 Awandare GA, Nyarko PB, Aniweh Y, Ayivor-Djanie R & Stoute JA (2018) *Plasmodium falciparum*  
5 strains spontaneously switch invasion phenotype in suspension culture. *Sci. Rep.* **8**: 5782
- 6 Baker DA, Stewart LB, Large JM, Bowyer PW, Ansell KH, Jiménez-Díaz MB, El Bakkouri M, Birchall K,  
7 Dechering KJ, Bouloc NS, Coombs PJ, Whalley D, Harding DJ, Smiljanic-Hurley E, Wheldon MC,  
8 Walker EM, Dessens JT, Lafuente MJ, Sanz LM, Gamo F-J, et al (2017) A potent series targeting  
9 the malarial cGMP-dependent protein kinase clears infection and blocks transmission. *Nat.*  
10 *Commun.* **8**: 430
- 11 Baum J & Cowman AF (2011) Revealing a parasite’s invasive trick. *Science* **333**: 410–411
- 12 Baum J, Richard D, Healer J, Rug M, Krnajski Z, Gilberger T-W, Green JL, Holder AA & Cowman AF  
13 (2006) A Conserved Molecular Motor Drives Cell Invasion and Gliding Motility across Malaria  
14 Life Cycle Stages and Other Apicomplexan Parasites. *J. Biol. Chem.* **281**: 5197–5208
- 15 Bergman LW, Kaiser K, Fujioka H, Coppens I, Daly TM, Fox S, Matuschewski K, Nussenzweig V &  
16 Kappe SHI (2003) Myosin A tail domain interacting protein (MTIP) localizes to the inner  
17 membrane complex of *Plasmodium sporozoites*. *J. Cell Sci.* **116**: 39–49
- 18 Bichet M, Touquet B, Gonzalez V, Florent I, Meissner M & Tardieux I (2016) Genetic impairment of  
19 parasite myosin motors uncovers the contribution of host cell membrane dynamics to  
20 *Toxoplasma* invasion forces. *BMC Biol.* **14**: 97
- 21 Birnbaum J, Flemming S, Reichard N, Soares AB, Mesén-Ramírez P, Jonscher E, Bergmann B &  
22 Spielmann T (2017) A genetic system to study *Plasmodium falciparum* protein function. *Nat.*  
23 *Methods* **14**: 450–456
- 24 Bookwalter CS, Tay CL, McCrorie R, Previs MJ, Lu H, Kremontsova EB, Fagnant PM, Baum J & Trybus  
25 KM (2017) Reconstitution of the core of the malaria parasite glideosome with recombinant  
26 *Plasmodium* class XIV myosin A and *Plasmodium* actin. *J. Biol. Chem.* **292**: 19290–19303
- 27 Boyle MJ, Wilson DW, Richards JS, Riglar DT, Tetteh KKA, Conway DJ, Ralph SA, Baum J & Beeson JG  
28 (2010) Isolation of viable *Plasmodium falciparum* merozoites to define erythrocyte invasion  
29 events and advance vaccine and drug development. *Proc. Natl. Acad. Sci. U. S. A.* **107**: 14378–  
30 83
- 31 Bullen HE, Jia Y, Yamaro-Botté Y, Bisio H, Zhang O, Jemelin NK, Marq JB, Carruthers V, Botté CY &  
32 Soldati-Favre D (2016) Phosphatidic Acid-Mediated Signaling Regulates Microneme Secretion in

- 1           Toxoplasma. *Cell Host Microbe* **19**: 349–360
- 2       Burns AL, Dans MG, Balbin JM, De Koning-Ward TF, Gilson PR, Beeson JG, Boyle MJ & Wilson DW  
3           (2019) Targeting malaria parasite invasion of red blood cells as an antimalarial strategy. *FEMS*  
4           *Microbiol. Rev.* **43**: 223–238
- 5       Das S, Lemgruber L, Tay CL, Baum J & Meissner M (2017) Multiple essential functions of Plasmodium  
6           falciparum actin-1 during malaria blood-stage development. *BMC Biol.* **15**: 70
- 7       Dasgupta S, Auth T, Gov NS, Satchwell TJ, Hanssen E, Zuccala ES, Riglar DT, Toye AM, Betz T, Baum J  
8           & Gompper G (2014) Membrane-wrapping contributions to malaria parasite invasion of the  
9           human erythrocyte. *Biophys. J.* **107**: 43–54
- 10      van Dijk MR, van Schaijk BCL, Khan SM, van Dooren MW, Ramesar J, Kaczanowski S, van Gemert GJ  
11           van, Kroeze H, Stunnenberg HG, Eling WM, Sauerwein RW, Waters AP & Janse CJ (2010) Three  
12           members of the 6-cys protein family of plasmodium play a role in gamete fertility. *PLoS Pathog.*  
13           **6**: 1–13
- 14      Dvorak J, Miller L, Whitehouse W & Shiroishi T (1975) Invasion of erythrocytes by malaria  
15           merozoites. *Science (80-. ).* **187**: 748–750
- 16      Fang H, Gomes AR, Klages N, Pino P, Maco B, Walker EM, Zenonos ZA, Angrisano F, Baum J, Doerig C,  
17           Baker DA, Billker O & Brochet M (2018) Epistasis studies reveal redundancy among calcium-  
18           dependent protein kinases in motility and invasion of malaria parasites. *Nat. Commun.* **9**: 4248
- 19      Fréna1 K, Dubremetz J-F, Lebrun M & Soldati-Favre D (2017) Gliding motility powers invasion and  
20           egress in Apicomplexa. *Nat. Rev. Microbiol.* **15**: 645–660
- 21      Fréna1 K, Marq J-B, Jacot D, Polonais V & Soldati-Favre D (2014) Plasticity between MyoC- and MyoA-  
22           Glideosomes: An Example of Functional Compensation in Toxoplasma gondii Invasion. *PLoS*  
23           *Pathog.* **10**: e1004504
- 24      Fréna1 K, Polonais V, Marq JB, Stratmann R, Limenitakis J & Soldati-Favre D (2010) Functional  
25           dissection of the apicomplexan glideosome molecular architecture. *Cell Host Microbe* **8**: 343–  
26           357
- 27      Gilson PR & Crabb BS (2009) Morphology and kinetics of the three distinct phases of red blood cell  
28           invasion by Plasmodium falciparum merozoites. *Int. J. Parasitol.* **39**: 91–96
- 29      Graindorge A, Fréna1 K, Jacot D, Salamun J, Marq JB & Soldati-Favre D (2016) The Conoid Associated  
30           Motor MyoH Is Indispensable for Toxoplasma gondii Entry and Exit from Host Cells. *PLoS*  
31           *Pathog.* **12**: e1005388

- 1 Gras S, Jimenez-Ruiz E, Klinger CM, Schneider K, Klingl A, Lemgruber L & Meissner M (2019) An  
2 endocytic-secretory cycle participates in *Toxoplasma gondii* in motility. *PLoS Biol.* **17**: e3000060
- 3 Herm-Götz A, Agop-Nersesian C, Münter S, Grimley JS, Wandless TJ, Frischknecht F & Meissner M  
4 (2007) Rapid control of protein level in the apicomplexan *Toxoplasma gondii*. *Nat. Methods* **4**:  
5 1003–1005
- 6 Hettmann C, Herm A, Geiter A, Frank B, Schwarz E, Soldati T & Soldati D (2000) A dibasic motif in the  
7 tail of a class XIV apicomplexan myosin is an essential determinant of plasma membrane  
8 localization. *Mol. Biol. Cell* **11**: 1385–400
- 9 Jones ML, Das S, Belda H, Collins CR, Blackman MJ & Treeck M (2016) A versatile strategy for rapid  
10 conditional genome engineering using loxP sites in a small synthetic intron in *Plasmodium*  
11 *falciparum*. *Nat. Sci. Reports* **6**: 21800
- 12 Kariuki SN, Marin-Menendez A, Introini V, Ravenhill BJ, Lin Y-C, Macharia A, Makale J, Tendwa M,  
13 Nyamu W, Kotar J, Carrasquilla M, Rowe JA, Rockett K, Kwiatkowski D, Weekes MP, Cicuta P,  
14 Williams TN & Rayner JC (2018) Red blood cell tension controls *Plasmodium falciparum*  
15 invasion and protects against severe malaria in the Dantu blood group. *bioRxiv*: 475442
- 16 Kelley LA, Mezulis S, Yates CM, Wass MN & Sternberg MJE (2015) The Phyre2 web portal for protein  
17 modeling, prediction and analysis. *Nat. Protoc.* **10**: 845–858
- 18 Koch M & Baum J (2016) The mechanics of malaria parasite invasion of the human erythrocyte -  
19 towards a reassessment of the host cell contribution. *Cell. Microbiol.* **18**: 319–329
- 20 Koch M, Wright KE, Otto O, Herbig M, Salinas ND, Tolia NH, Satchwell TJ, Guck J, Brooks NJ & Baum J  
21 (2017) *Plasmodium falciparum* erythrocyte-binding antigen 175 triggers a biophysical change in  
22 the red blood cell that facilitates invasion. *Proc. Natl. Acad. Sci. U. S. A.* **114**: 4225–4230
- 23 Labun K, Montague TG, Krause M, Torres Cleuren YN, Tjeldnes H & Valen E (2019) CHOPCHOP v3:  
24 expanding the CRISPR web toolbox beyond genome editing. *Nucleic Acids Res.* **47**: W171–W174
- 25 Lu H, Fagnant PM & Trybus KM (2019) Unusual dynamics of the divergent malaria parasite Pf Act1  
26 actin filament. *Proc. Natl. Acad. Sci.* **116**: 20418–20427
- 27 Meissner M, Schlüter D & Soldati D (2002) Role of *Toxoplasma gondii* myosin A in powering parasite  
28 gliding and host cell invasion. *Science* **298**: 837–40
- 29 Mesén-Ramírez P, Reinsch F, Blancke Soares A, Bergmann B, Ullrich A-K, Tenzer S & Spielmann T  
30 (2016) Stable Translocation Intermediates Jam Global Protein Export in *Plasmodium falciparum*  
31 Parasites and Link the PTEX Component EXP2 with Translocation Activity. *PLOS Pathog.* **12**:

- 1 e1005618
- 2 Miller LH, Aikawa M, Johnson JG & Shiroishi T (1979) Interaction between cytochalasin B-treated  
3 malarial parasites and erythrocytes. Attachment and junction formation. *J. Exp. Med.* **149**: 172–  
4 84
- 5 Moreau CA, Bhargav SP, Kumar H, Quadt KA, Piirainen H, Strauss L, Kehrer J, Streichfuss M, Spatz JP,  
6 Wade RC, Kursula I & Frischknecht F (2017) A unique profilin-actin interface is important for  
7 malaria parasite motility. *PLOS Pathog.* **13**: e1006412
- 8 Münter S, Sabass B, Selhuber-Unkel C, Kudryashev M, Hegge S, Engel U, Spatz JP, Matuschewski K,  
9 Schwarz US & Frischknecht F (2009) Plasmodium Sporozoite Motility Is Modulated by the  
10 Turnover of Discrete Adhesion Sites. *Cell Host Microbe* **6**: 551–562
- 11 Nyarko PB, Tarr SJ, Aniweh Y, Stewart LB, Conway DJ & Awandare GA (2020) Investigating a  
12 Plasmodium falciparum erythrocyte invasion phenotype switch at the whole transcriptome  
13 level. *Sci. Rep.* **10**: 245
- 14 Oehring SC, Woodcroft BJ, Moes S, Wetzel J, Dietz O, Pulfer A, Dekiwadia C, Maeser P, Flueck C,  
15 Witmer K, Brancucci NM, Niederwieser I, Jenoe P, Ralph SA & Voss TS (2012) Organellar  
16 proteomics reveals hundreds of novel nuclear proteins in the malaria parasite Plasmodium  
17 falciparum. *Genome Biol.* **13**: R108
- 18 Patel A, Perrin AJ, Flynn HR, Bisson C, Withers-Martinez C, Treeck M, Flueck C, Nicastro G, Martin SR,  
19 Ramos A, Gilberger TW, Snijders AP, Blackman MJ & Baker DA (2019) Cyclic AMP signalling  
20 controls key components of malaria parasite host cell invasion machinery. *PLOS Biol.* **17**:  
21 e3000264
- 22 Paul AS, Saha S, Engelberg K, Jiang RHY, Coleman BI, Kosber AL, Chen CT, Ganter M, Espy N, Gilberger  
23 TW, Gubbels MJ & Duraisingh MT (2015) Parasite calcineurin regulates host cell recognition  
24 and attachment by apicomplexans. *Cell Host Microbe* **18**: 49–60
- 25 Pavlou G, Biesaga M, Touquet B, Lagal V, Balland M, Dufour A, Hakimi M ali & Tardieux I (2018)  
26 Toxoplasma Parasite Twisting Motion Mechanically Induces Host Cell Membrane Fission to  
27 Complete Invasion within a Protective Vacuole. *Cell Host Microbe* **24**: 81-96.e5
- 28 Perrin AJ, Collins CR, Russell MRG, Collinson LM, Baker DA & Blackman MJ (2018) The Actinomyosin  
29 Motor Drives Malaria Parasite Red Blood Cell Invasion but Not Egress. *MBio* **9**: 1–13
- 30 Pettersen EF, Goddard TD, Huang CC, Couch GS, Greenblatt DM, Meng EC & Ferrin TE (2004) UCSF  
31 Chimera - A visualization system for exploratory research and analysis. *J. Comput. Chem.* **25**:  
32 1605–1612

- 1 Philip N & Waters AP (2015) Conditional Degradation of Plasmodium Calcineurin Reveals Functions  
2 in Parasite Colonization of both Host and Vector. *Cell Host Microbe* **18**: 122–131
- 3 Quadt KA, Streichfuss M, Moreau CA, Spatz JP & Frischknecht F (2016) Coupling of Retrograde Flow  
4 to Force Production during Malaria Parasite Migration. *ACS Nano* **10**: 2091–2102
- 5 Radfar A, Méndez D, Moneriz C, Linares M, Marín-García P, Puyet A, Diez A & Bautista JM (2009)  
6 Synchronous culture of Plasmodium falciparum at high parasitemia levels. *Nat. Protoc.* **4**:  
7 1899–1915
- 8 Riglar DT, Richard D, Wilson DW, Boyle MJ, Dekiwadia C, Turnbull L, Angrisano F, Marapana DS,  
9 Rogers KL, Whitchurch CB, Beeson JG, Cowman AF, Ralph SA & Baum J (2011) Super-resolution  
10 dissection of coordinated events during malaria parasite invasion of the human erythrocyte.  
11 *Cell Host Microbe* **9**: 9–20
- 12 Robert-Paganin J, Robblee JP, Auguin D, Blake TCA, Bookwalter CS, Kremontsova EB, Moussaoui D,  
13 Previs MJ, Jousset G, Baum J, Trybus KM & Houdusse A (2019) Plasmodium myosin A drives  
14 parasite invasion by an atypical force generating mechanism. *Nat. Commun.* **10**: 3286
- 15 Del Rosario M, Periz J, Pavlou G, Lyth O, Latorre-Barragan F, Das S, Pall GS, Stortz JF, Lemgruber L,  
16 Whitelaw JA, Baum J, Tardieux I & Meissner M (2019) Apicomplexan F-actin is required for  
17 efficient nuclear entry during host cell invasion. *EMBO Rep.* **20**: e48896
- 18 Schindelin J, Arganda-Carreras I, Frise E, Kaynig V, Longair M, Pietzsch T, Preibisch S, Rueden C,  
19 Saalfeld S, Schmid B, Tinevez J-Y, White DJ, Hartenstein V, Eliceiri K, Tomancak P & Cardona A  
20 (2012) Fiji: an open-source platform for biological-image analysis. *Nat. Methods* **9**: 676–82
- 21 Schindelin J, Rueden CT, Hiner MC & Eliceiri KW (2015) The ImageJ ecosystem: An open platform for  
22 biomedical image analysis. *Mol. Reprod. Dev.* **82**: 518–29
- 23 Sidén-Kiamos I, Ganter M, Kunze A, Hliscs M, Steinbüchel M, Mendoza J, Sinden RE, Louis C &  
24 Matuschewski K (2011) Stage-specific depletion of myosin A supports an essential role in  
25 motility of malarial ookinetes. *Cell. Microbiol.* **13**: 1996–2006
- 26 Singh S, Alam MM, Pal-Bhowmick I, Brzostowski JA & Chitnis CE (2010) Distinct external signals  
27 trigger sequential release of apical organelles during erythrocyte invasion by malaria parasites.  
28 *PLoS Pathog.* **6**: e1000746
- 29 Sisqueira X, Nebl T, Thompson JK, Whitehead L, Malpede BM, Salinas ND, Rogers K, Tolia NH, Fleig A,  
30 O'Neill J, Tham W-H, David Horgen F & Cowman AF (2017) Plasmodium falciparum ligand  
31 binding to erythrocytes induce alterations in deformability essential for invasion. *Elife* **6**:  
32 e21083

- 1 Stortz JF, Del Rosario M, Singer M, Wilkes JM, Meissner M & Das S (2019) Formin-2 drives  
2 polymerisation of actin filaments enabling segregation of apicoplasts and cytokinesis in  
3 *Plasmodium falciparum*. *Elife* **8**: e49030
- 4 Tardieux I & Baum J (2016) Reassessing the mechanics of parasite motility and host-cell invasion. *J.*  
5 *Cell Biol.* **214**: 507–515
- 6 Tham W-H, Lim NTY, Weiss GE, Lopaticki S, Ansell BRE, Bird M, Lucet I, Dorin-Semblat D, Doerig C,  
7 Gilson PR, Crabb BS & Cowman AF (2015) Plasmodium falciparum Adhesins Play an Essential  
8 Role in Signalling and Activation of Invasion into Human Erythrocytes. *PLOS Pathog.* **11**:  
9 e1005343
- 10 Trager W & Jensen JB (1976) Human malaria parasites in continuous culture. *Science (80- )*. **193**:  
11 673–5
- 12 Uboldi AD, Wilde ML, McRae EA, Stewart RJ, Dagley LF, Yang L, Katris NJ, Hapuarachchi S V., Coffey  
13 MJ, Lehane AM, Botte CY, Waller RF, Webb AI, McConville MJ & Tonkin CJ (2018) Protein kinase  
14 A negatively regulates Ca<sup>2+</sup> signalling in *Toxoplasma gondii*. *PLoS Biol.* **16**: e2005642
- 15 Volz JC, Yap A, Sisquella X, Thompson JK, Lim NTY, Whitehead LW, Chen L, Lampe M, Tham W-H,  
16 Wilson D, Nebl T, Marapana D, Triglia T, Wong W, Rogers KL & Cowman AF (2016) Essential  
17 Role of the PfRh5/PfRipr/CyRPA Complex during Plasmodium falciparum Invasion of  
18 Erythrocytes. *Cell Host Microbe* **20**: 60–71
- 19 Wall RJ, Zeeshan M, Katris NJ, Limenitakis R, Rea E, Stock J, Brady D, Waller RF, Holder AA & Tewari R  
20 (2019) Systematic analysis of Plasmodium myosins reveals differential expression, localisation,  
21 and function in invasive and proliferative parasite stages. *Cell. Microbiol.* **21**: e13082
- 22 Weiss GE, Gilson PR, Taechalertpaisarn T, Tham W-H, de Jong NWM, Harvey KL, Fowkes FJI, Barlow  
23 PN, Rayner JC, Wright GJ, Cowman AF & Crabb BS (2015) Revealing the Sequence and Resulting  
24 Cellular Morphology of Receptor-Ligand Interactions during Plasmodium falciparum Invasion of  
25 Erythrocytes. *PLOS Pathog.* **11**: e1004670
- 26 White J, Dhingra SK, Deng X, El Mazouni F, Lee MCS, Afanador GA, Lawong A, Tomchick DR, Ng CL,  
27 Bath J, Rathod PK, Fidock DA & Phillips MA (2019) Identification and Mechanistic  
28 Understanding of Dihydroorotate Dehydrogenase Point Mutations in Plasmodium falciparum  
29 that Confer in Vitro Resistance to the Clinical Candidate DSM265. *ACS Infect. Dis.* **5**: 90–101
- 30 Whitelaw JA, Latorre-Barragan F, Gras S, Pall GS, Leung JM, Heaslip A, Egarter S, Andenmatten N,  
31 Nelson SR, Warshaw DM, Ward GE & Meissner M (2017) Surface attachment, promoted by the  
32 actomyosin system of *Toxoplasma gondii* is important for efficient gliding motility and invasion.

- 1 *BMC Biol.* **15**: 1
- 2 Wong W, Skau CT, Marapana DS, Hanssen E, Taylord NL, Riglar DT, Zuccala ES, Angrisano F, Lewis H,  
3 Catimel B, Clarke OB, Kershaw NJ, Perugini MA, Kovar DR, Gulbis JM & Baum J (2011) Minimal  
4 requirements for actin filament disassembly revealed by structural analysis of malaria parasite  
5 actin-depolymerizing factor 1. *Proc. Natl. Acad. Sci. U. S. A.* **108**: 9869–9874
- 6 Yahata K, Hart MN, Davies H, Asada M, Templeton TJ, Treeck M, Moon RW & Kaneko O (2020)  
7 Gliding motility of Plasmodium merozoites. *bioRxiv*: 2020.05.01.072637
- 8 Yap A, Azevedo MF, Gilson PR, Weiss GE, O’Neill MT, Wilson DW, Crabb BS & Cowman AF (2014)  
9 Conditional expression of apical membrane antigen 1 in Plasmodium falciparum shows it is  
10 required for erythrocyte invasion by merozoites. *Cell. Microbiol.* **16**: 642–656
- 11 Yusuf NA, Green JL, Wall RJ, Knuepfer E, Moon RW, Schulte-Huxel C, Stanway RR, Martin SR, Howell  
12 SA, Douse CH, Cota E, Tate EW, Tewari R & Holder AA (2015) The Plasmodium Class XIV Myosin,  
13 MyoB, Has a Distinct Subcellular Location in Invasive and Motile Stages of the Malaria Parasite  
14 and an Unusual Light Chain. *J. Biol. Chem.* **290**: 12147–12164
- 15
